# Supplementary material for: Rieske Oxygenase Catalyzed C–H Bond Functionalization Reactions in Chlorophyll b Biosynthesis
Source: PubMed Central journal article supplement (PMC9615114; doi:10.1021/acscentsci.2c00058), 2022-07-27
Supplement: oc2c00058_si_001.pdf [file oc2c00058_si_001.pdf]

**Supporting Information For:**

**Rieske Oxygenase Catalyzed C–H Bond Functionalization Reactions in Chlorophyll *b* Biosynthesis**

Jianxin Liu, Madison Knapp, Minshik Jo, Zerick Dill, and Jennifer Bridwell-Rabb\*

Department of Chemistry, University of Michigan, Ann Arbor, Michigan, 48109

\*To whom correspondence should be addressed: [jebridwe@umich.edu](mailto:jebridwe@umich.edu)

|                                                                                                                                                                                                   |               |
|---------------------------------------------------------------------------------------------------------------------------------------------------------------------------------------------------|---------------|
| <b>Table of Contents:</b>                                                                                                                                                                         | <b>S1-S2</b>  |
| <b>I. Supplementary Figures</b>                                                                                                                                                                   | <b>S3-S27</b> |
| <b>Supplementary Figure 1.</b> Structures of Chlorophyll (Chl) and Chlorophyllide (Chlide) pigments <i>a</i> and <i>b</i> .                                                                       |               |
| <b>Supplementary Figure 2.</b> Sequence alignment of CAO homologs used in this work.                                                                                                              |               |
| <b>Supplementary Figure 3.</b> Purification of CAO homologs.                                                                                                                                      |               |
| <b>Supplementary Figure 4.</b> Enzymes involved in Chl <i>b</i> metabolism.                                                                                                                       |               |
| <b>Supplementary Figure 5.</b> A standard curve was used to convert Q-TOF LC-MS peak area into the amounts of pigments that were produced and consumed in the chlorophyllase-catalyzed reactions. |               |
| <b>Supplementary Figure 6.</b> Chlorophyllase can be used as a tool to produce the needed Chlide <i>a</i> and Chlide <i>b</i> standards.                                                          |               |
| <b>Supplementary Figure 7.</b> Several chemical reductants and the peroxide (H <sub>2</sub> O <sub>2</sub> ) shunt reaction were tested in the CAO reactions.                                     |               |
| <b>Supplementary Figure 8. Supplementary Figure 6.</b> The addition of sodium dithionite, ascorbate, and TiCl <sub>3</sub> change the distinctive absorption peaks of Chlorophyll <i>a</i> .      |               |
| <b>Supplementary Figure 9.</b> Cell lysate from four different photosynthetic organisms was tested for its ability to support Chlide <i>b</i> production.                                         |               |
| <b>Supplementary Figure 10.</b> The stereochemistry at the C-13 <sup>2</sup> position of Chl pigments can be changed using acid-base chemistry.                                                   |               |
| <b>Supplementary Figure 11.</b> Analysis of the enzymatically produced Chlide <i>a</i> standard.                                                                                                  |               |
| <b>Supplementary Figure 12.</b> Analysis of the enzymatically produced Chlide <i>b</i> standard and the product of the CAO reaction.                                                              |               |
| <b>Supplementary Figure 13.</b> Five different non-native reductase systems were tested for their ability to support Chlide <i>b</i> production.                                                  |               |
| <b>Supplementary Figure 14.</b> VanB can mediate the reduction of the Rieske cluster in <i>Ph</i> CAO.                                                                                            |               |
| <b>Supplementary Figure 15.</b> The diastereomer distribution of Chlide <i>a</i> and Chlide <i>b</i> can be shifted by triethylamine (TEA) or pyridine.                                           |               |
| <b>Supplementary Figure 16.</b> The diastereomer equilibrium of the Chlide <i>a</i> and Chlide <i>a'</i> can be shifted by <i>A. thaliana</i> cell lysate.                                        |               |

**Supplementary Figure 17.** A certain diastereomer of Chl *a* is preferred by chlorophyllase.

**Supplementary Figure 18.** The Chlide *a'* diastereomer is preferred by all tested homologs of CAO.

**Supplementary Figure 19.** A standard curve for Q-TOF LC-MS was used to determine the amount of intermediate (7-OH-Chlorophyllide *a*) in the reactions.

**Supplementary Figure 20.** Chlorophyllase can be used as a tool to produce a 7-OH-Chlide *a* standard.

**Supplementary Figure 21.** Analysis of the chemically produced 7-OH-Chlide *a* standard and the intermediate produced in the CAO reaction.

**Supplementary Figure 22.** Extracted ion chromatograms for the CAO homolog reaction products when combined with VanB, NADPH, and a 7-OH-Chlide *a* substrate.

**Supplementary Figure 23.** Steady state kinetic behavior of *Ph*CAO with a 7 OH-Chlide *a* substrate.

**Supplementary Figure 24.** Chlorophyll *a* and Pheophorbide *a* are not substrates of the CAO homologs.

**Supplementary Figure 25.** The activity of the CAO homologs was tested on Bacteriochlorophyll *a* and Bacteriochlorophyllide *a* substrates.

**Supplementary Figure 26.** Analysis for the chemically produced Chlide *d* (3-formyl-Chlide *a*).

**Supplementary Figure 27.** Analysis for the 3-formyl-Chlide *b* produced in the CAO reaction.

**II. Supplementary Methods S28-S40**

**Ila. DNA and protein sequences**

**Ilb. Protein production and purification**

**Ilc. Preparation of Substrates and Product Standards**

**Ild. Enzymatic Reactions**

**III. Supplementary References S41**

## I. Supplementary Figures

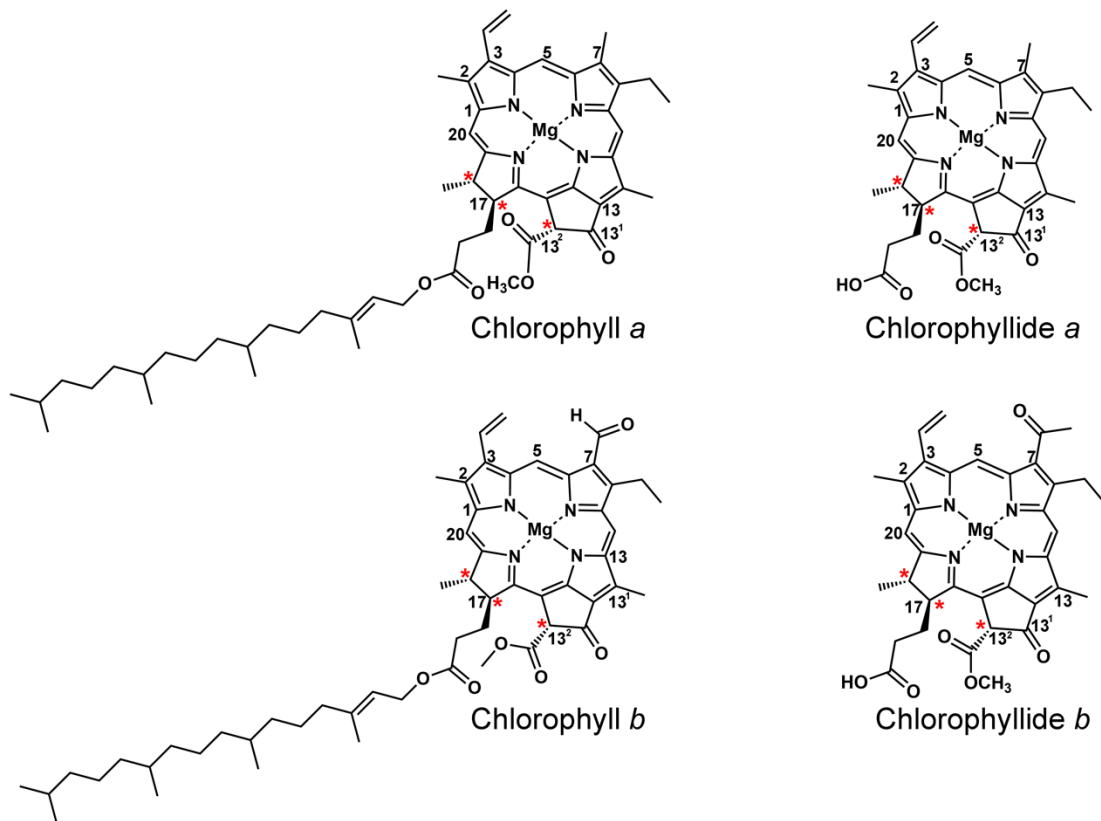

**Supplementary Figure 1.** Structures of Chlorophyll (Chl) and Chlorophyllide (Chlide) pigments *a* and *b*. Each pigment has the scaffold carbon atoms numbered and the chiral centers are indicated by a red asterisk. Chlorophyll *a* differs from Chlorophyllide by the presence of a phytol tail (C<sub>20</sub>H<sub>39</sub>).

|       |                                                                |     |
|-------|----------------------------------------------------------------|-----|
| CrCAO | -----MLPASLQQRKAAAVGGRGPTNQSRVAVRVSAQPKEAPPASTPIVEDPESK        | 49  |
| PhCAO | -----                                                          | 0   |
| AtCAO | MNAAVFSPSALSPLISFSKTRSSFLSRK-----KGVKGEFRV                     | 37  |
| CrCAO | FRRYGKHFGGIHKLSMDWLDSVPRVVRVTKDSRQLDDMLEL--AVLNERLAGRLEPWQAR   | 107 |
| PhCAO | -----                                                          | 0   |
| AtCAO | FAVFGDESGLV-EKKSQWRPLFDVEDPRSKAPPYKGFLELVNQAIEVARFDIQYLDWRAR   | 96  |
| CrCAO | QKLEYLRKRKRKNWERIFEYVTRQDAAATLAMIEEANRKEVEESLSEAREKTAVGDLRDQL  | 167 |
| PhCAO | -----                                                          | 0   |
| AtCAO | QDLL-----TIMILHDKVVDVLNPLAREYKSIGTVKKEL                        | 130 |
| CrCAO | ESLRAQVAQAQERLMTQSRVEQNLRVNELKAEATTLEMRKASDLDIKERERIAISTV      | 227 |
| PhCAO | -----                                                          | 0   |
| AtCAO | AGLQEELSKAHQQVHISEARVSTALDKLAHMEEL-----VNDRLLPGRV              | 174 |
| CrCAO | AAKGPASSSSSAAAVSAPATSATLTVERPAATTVTQEVSTSYGTPVDRAPRRSKAAIRR    | 287 |
| PhCAO | -----MNN                                                       | 3   |
| AtCAO | VT-----ELDKPSSSTTAS-----AVELDRE--K'NTGAK                       | 202 |
| CrCAO | SRG-LESSMEIEEGLRNFWYPAEFSARLPKDTLVPFELFGEPPWVMFRDEKQPSCIRDEC   | 346 |
| PhCAO | SLNVSAT-LDLANGLRNFWYPVEFSKNLGMADPLGFELFDQCWVLFRRDQGTACILDEC    | 62  |
| AtCAO | SLNVSQVPPYPSPHLKNFWYPVAFADLKHDTMVPICEFQPPWIFRGEDGKPGCVRNTC     | 262 |
| CrCAO | AHRGCPLSLGKVVVEGQVMCPYHGWEFNGDGACTKMPSTPFCRNVGVAALPCAEDGFIWV   | 406 |
| PhCAO | AHRACPLSLGKVIQGRIQCPYHGWEYDRQGEVHMPSCQAIS-NPILTLVMEQGGMIWV     | 121 |
| AtCAO | AHRACPLDLGTVNEGRIQCPYHGWEYSTDGECKMPSTKLLK-VKIKSLPCLEQEGMIWI    | 321 |
| CrCAO | WPGDGLPAETLPDFA-QPPEGFLIHAEIMVDVPEHGLLIENLLDLAHAPFHTSTFARG     | 465 |
| PhCAO | WPGTDEPGAL-PSLAPTLPDNFTLQAEVMDLEVEHGLMLENLLDLAHAPFHTGTFAKG     | 180 |
| AtCAO | WPGDEPPAPILPSL--QPPSGFLIHAEVMDLPEHGLLLDNLLDLAHAPFHTSTFARG      | 379 |
| CrCAO | WPVPDFVKFHA--NKALSGFWDYPIDMAFQPPCMTLSTIGLAQPGKIMRGVTASQCKNH    | 523 |
| PhCAO | WPVPPFVRFANAATTPWTGHWDYPPIHMTFEPFCFVISTIGLR-----GKDCGRH        | 230 |
| AtCAO | WSVPSLVKFLTP-TSGLQGYWDPYPIDMEFKPPCIVLSTIGISKPGKL-EGKSTQQCATH   | 437 |
| CrCAO | LHQLHVCMPSSKKGHTRLLYRMSLDFLPWMRHVPFIDRIWKQVAAQVLGEDLVLVLGQQDR  | 583 |
| PhCAO | LHQVHACLPRGQGRTRLLYRLALDFGHWRWVPGTHCLWQHLANRVIQEDLRLVQGQER     | 290 |
| AtCAO | LHQLHVCLPSSKNKTRLLYRMSLDFAPILKNLPFMEHLWRHFAEQVLNEDLRLVLGQER    | 497 |
| CrCAO | MLRGGSNWSNPAPYDKLAVRYRRWRNGVNAEVARVRAG-----E-PPSNPVAMS-----A   | 632 |
| PhCAO | LKGGANVWNQPVGYDKLGVAYRHWRNQRVERHGSWDPESPADEGREPALNAIVTGS DAPIT | 350 |
| AtCAO | MLNGANIWNLPVAYDKLGVRYRLWRNAVDRGDDKLPFSG-----                   | 536 |
| CrCAO | GEMFSVDEDDMDN---                                               | 645 |
| PhCAO | GSVVSLPPSQAPPTGH                                               | 366 |
| AtCAO | -----                                                          | 536 |

|        |                                                                |     |
|--------|----------------------------------------------------------------|-----|
| MpCAO1 | -----                                                          | 0   |
| PhCAO  | -----MNSLNVSAT---LDLANGLRNFWYPVEFSKNL                          | 30  |
| MpCAO2 | MAPEVSSSPAPVDASRGGAEKAARRLGMGRRFADEVSLDNPSDVGAI RNYWYPIHFISKL  | 60  |
| MpCAO1 | ----MIPFDLFNVPWVAFRDQDGMAGCIKDECAHRACPIISLGKVVVEGRVQCPYHGWEYT  | 55  |
| PhCAO  | GMAD-PLGFELFDQCWVLFRRDDQGTAAACILDECAHRACPLSLGKVIQGRIQCPYHGWEYD | 89  |
| MpCAO2 | NKGDAATSFVLFGERWELVADDDAAVAAAKTAVGVFG-P-EYAETQAHLVDGAAQRWT--   | 116 |
| MpCAO1 | SGGECKKMPSIKNLLPNVYVDAAPIVERDGLLYVWAGVWEPERAEIILSELPPSAATAPP   | 115 |
| PhCAO  | RQGECEVHMPSQAI SNP--ILTLFVMEQGGMIWVWPGTDEPGA-----LPSLAP TLP    | 139 |
| MpCAO2 | -----CRSRDDA--TRFLPIGLQDGLVM--PDVA-----LP-TTFTPP               | 149 |
| MpCAO1 | SGFAAMAE-VTVDVPLDAPAILSRLMDENKVPFTRVDTTTLSDDVFP--KVIA-----     | 165 |
| PhCAO  | DNFTLQAE-LVMDLEVEHGLMLENLLDLAHAPFTHGTGTFAKGWVPPFVRFANAAT----   | 194 |
| MpCAO2 | AGYTTHAELIIEDVPEHGLLMENLLDLAHAPFTHGTGTFAKGWVPTFVEFVTSKLRREG    | 209 |
| MpCAO1 | -----KVLRFGFKPAPKRVEFTPACILDSTIGLDGVGG-----                    | 198 |
| PhCAO  | -----TPWTGHWDPPYPIHMTFEPFCFVISTIGLR-----                       | 223 |
| MpCAO2 | DGWQDMARGLTREGIGLGSQQGSWNPYPIDMKFVTPCMVD SHIGMSQAGAAGKGAQFEEG  | 269 |
| MpCAO1 | ----QDWNVHQTHVVLPSRPGKARVLYRLSVDFVVGAEIARTVGGQVWQNLAE MILQE Q  | 253 |
| PhCAO  | --GKDCGRHLHQVHACLPRGQGRTRLLYRLALDFGHWLRWVPG-THCLWQH LANRVIQED  | 280 |
| MpCAO2 | VQCAECSNHLHQLHVCVPSEPGRTRLLYRMALDFAGWAKYVPG-IELVWTEMANQVLGED   | 328 |
| MpCAO1 | LEGIRGGR-----FEDDSVGEQAADV SQSYDEWMEEIQAPR-----                | 289 |
| PhCAO  | LRLVQGGQERLKGGANVWNQPVGY--DKLGVAYRHWRNQVERHGS DWPE SPADEGREPAL | 338 |
| MpCAO2 | LRLVTGQQDRMRRGGRVWAHPVAY--DKLGLVYRRWRNFSVGEACDV SAGIGAEGAGETA  | 386 |
| MpCAO1 | ----- 289                                                      |     |
| PhCAO  | NAIVTGS DAPI TGSVSVSLPPSQAPPTGH                                | 366 |
| MpCAO2 | QRSR----- 390                                                  |     |

**Supplementary Figure 2.** A sequence alignment of the different CAO homologs used in this work. The first sequence alignment is of *Prochlorothrix hollandica* (PhCAO), *Arabidopsis thaliana* (AtCAO), and *Chlamydomonas reinhardtii* (CrCAO). The second sequence alignment is of PhCAO with *Micromonas pusilla* (MpCAO). In both alignments, the Rieske cluster binding residues are shown in green and the mononuclear iron binding residues are shown in purple. These metalcenters are found in the catalytic domains of the CAO proteins. In the first alignment, the peach and blue colors correspond to the regulatory and linker domains, respectively<sup>1</sup>.

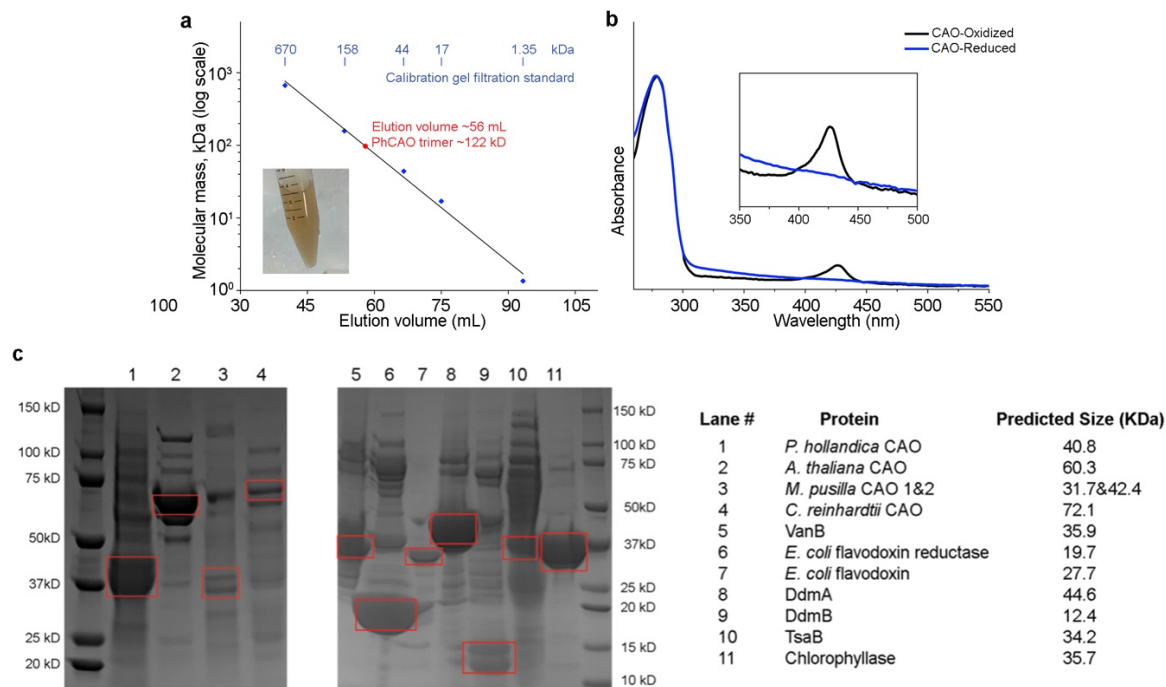

**Supplementary Figure 3.** Purification of CAO homologs. **a**, The molecular weight of native *Ph*CAO from the gel filtration chromatography step was estimated using a calibration curve (logarithm of molecular mass versus elution volume) generated from a Bio-Rad gel filtration standard (blue diamonds). **b**, The UV-Vis absorption spectra of the oxidized [2Fe-2S] Rieske cluster of as isolated CAO (black trace) was measured as was the absorption spectra in the presence of the chemical reductant sodium dithionite (blue trace). **c**, An SDS-PAGE gel of the proteins purified in this study. Each purified protein band is outlined in a red box. The predicted protein sizes were determined by the ProtParam tool on the ExPASy server and are indicated in the table on the right.

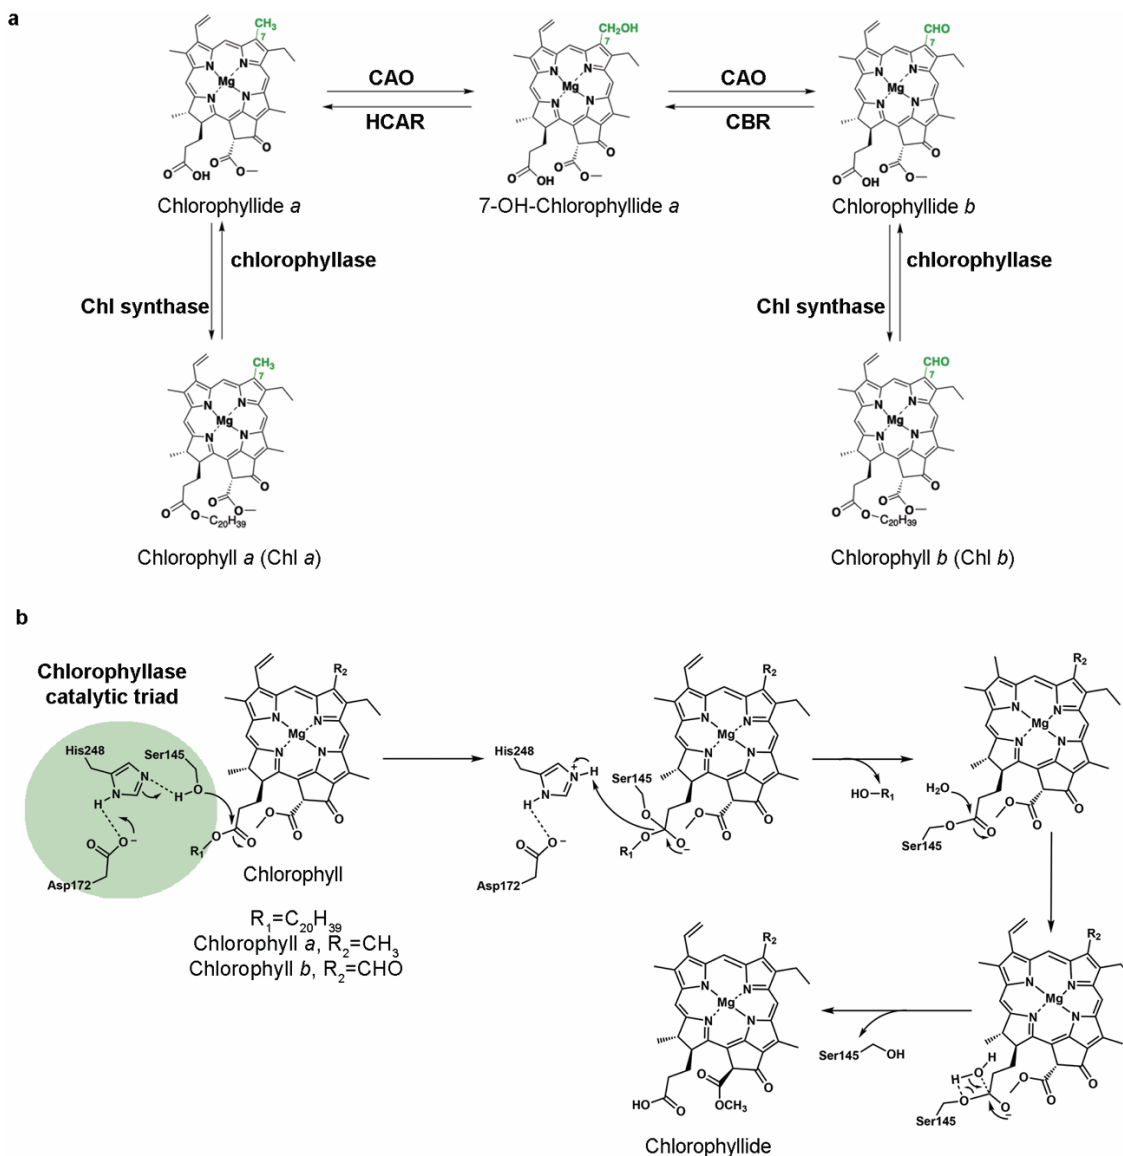

**Supplementary Figure 4.** Enzymes involved in Chl *b* metabolism. **a**, Chlorophyllase, a degradative enzyme hydrolyzes Chlorophyll into Chlorophyllide by removing the phytol group. Chlorophyllase was used in this work to produce the needed Chlide molecules. Chlorophyll synthase appends a phytol tail to the Chl scaffold. The proposed reactions that constitute the so-called “Chlorophyll cycle” are shown with Chlide for simplicity. Formation of the C7 formyl group in Chlorophyll(ide) *b* is proposed to proceed via two sequential reactions that transform the C7-methyl group of Chlorophyll(ide) *a* into the formyl group of Chlorophyll(ide) *b* through a C7-hydroxymethyl intermediate (7-OH-Chlorophyll(ide) *a*). Chlorophyll(ide) *b* reductase (CBR) and 7-hydroxymethyl-Chlorophyll a reductase (HCAR) are proposed to reduce Chlorophyll(ide) *b* back to Chlorophyll(ide) *a* to fulfill the cycle. **b**, A mechanistic proposal for the chlorophyllase catalyzed removal of the phytol tail from Chlorophyll. The catalytic triad of chlorophyllase, which is an annotated serine protease, is highlighted in a green circle.

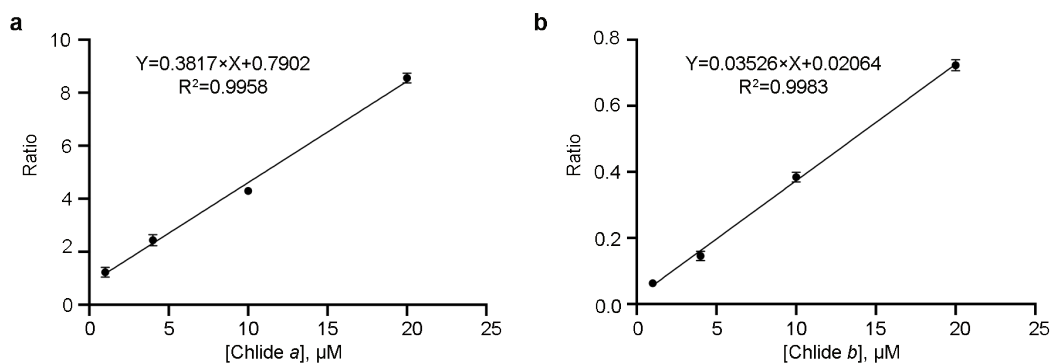

**Supplementary Figure 5.** A standard curve was used to convert the Q-TOF LC-MS peak area into the amounts of pigments that were produced and consumed in the chlorophyllase-catalyzed reactions. **a**, A standard curve for Chlorophyllide *a*. **b**, A standard curve for Chlorophyllide *b*. In both panels, the x-axis is the concentration of each Chlorophyllide compound whereas the y-axis is the ratio of the peak area integration of the Chlorophyllide compound to the 1,3,5-trimethoxybenzene (0.5 mM) internal standard. All data points were measured in duplicate.

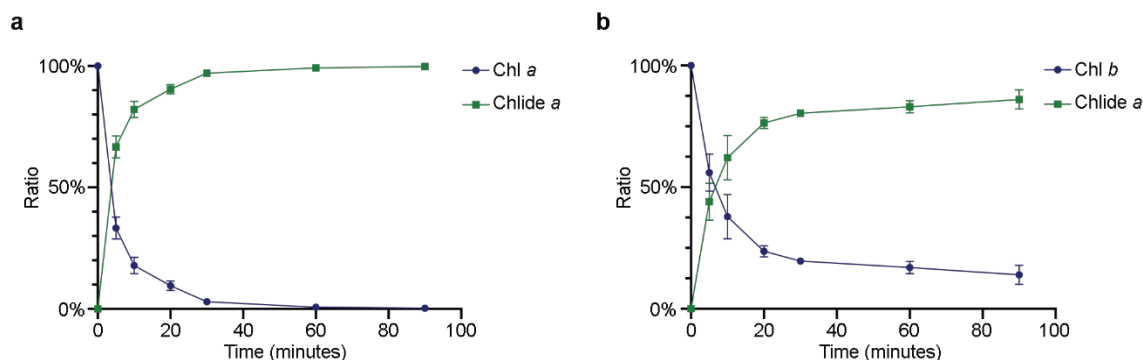

**Supplementary Figure 6.** Chlorophyllase can be used as a tool to produce the needed Chlide *a* and Chlide *b* standards. **a**, A time dependent measurement of Chl *a* (1 mM, blue) consumption and Chlide *a* production using chlorophyllase (1.5  $\mu\text{M}$ , green). The chlorophyllase reaction reaches the maximum amount of substrate conversion at 1 hour, which corresponds to conversion of nearly 100-percent Chl *a* into Chlide *a*. **b**, A time dependent measurement of Chl *b* (1 mM, blue) consumption and Chlide *b* production using chlorophyllase (1.5  $\mu\text{M}$ , green). The chlorophyllase reaction reaches the maximum amount of substrate conversion at 1.5 hours. At this point, nearly 85-percent of the Chl *b* substrate has been converted into Chlide *b*. For both panels, the data points were measured in duplicate.



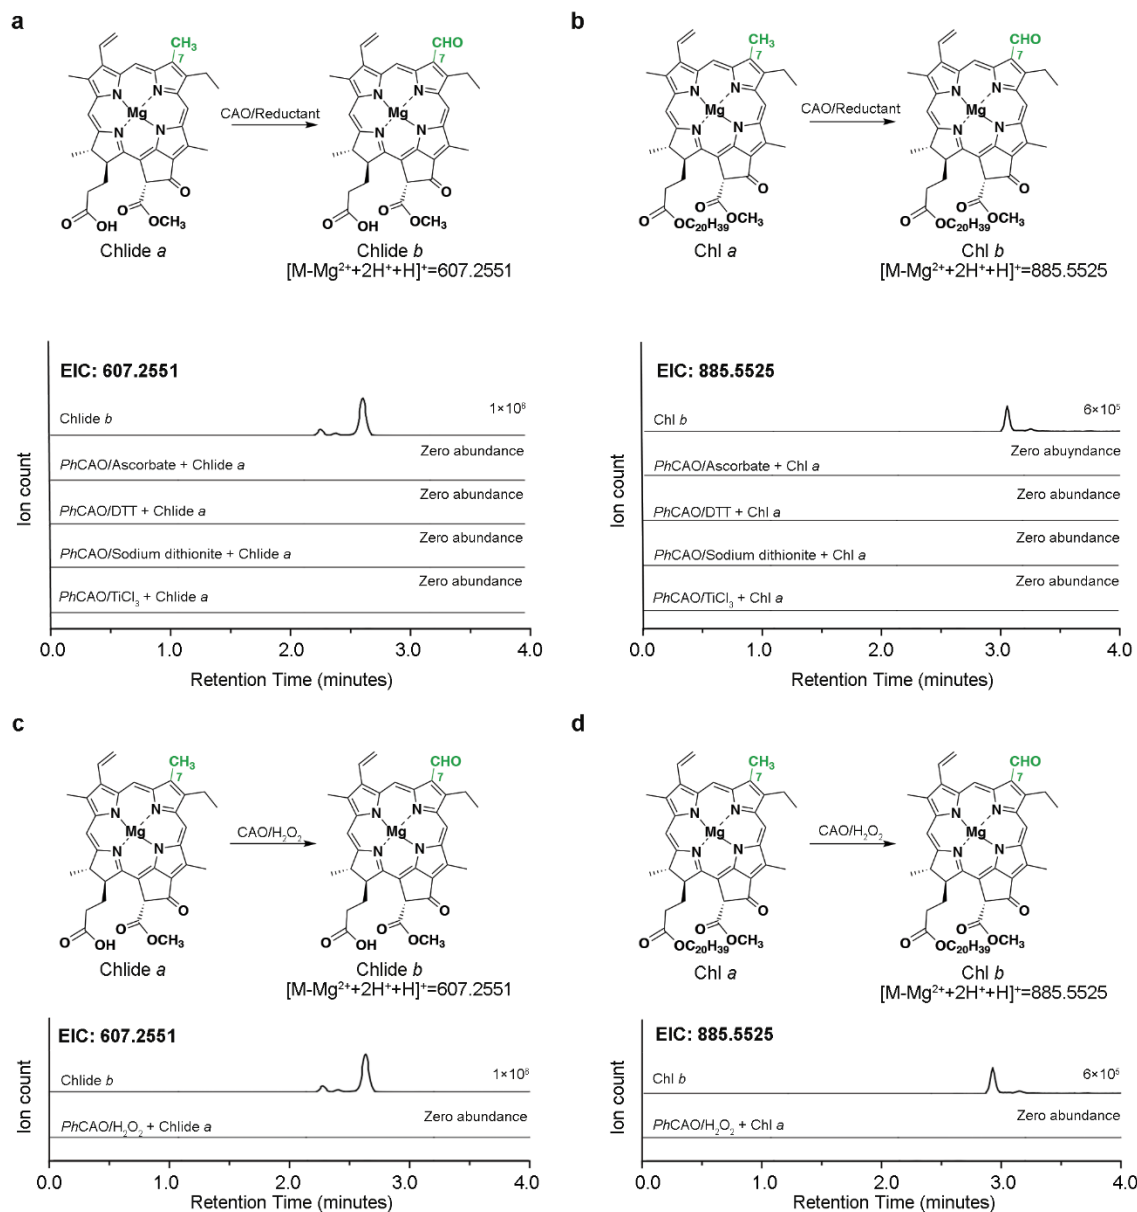

**Supplementary Figure 7.** Several chemical reductants and the peroxide ( $\text{H}_2\text{O}_2$ ) shunt reaction were tested in the CAO assays. **a**, CAO is unable to convert Chlide *a* into Chlide *b* using ascorbate, dithiothreitol (DTT), sodium dithionite, or titanium (III) chloride ( $\text{TiCl}_3$ ) as a reductant. **b**, Similarly, CAO does not catalyze the conversion of Chl *a* into Chl *b* using a chemical reductant. **c**, CAO is unable to transform Chlide *a* into Chlide *b* using  $\text{H}_2\text{O}_2$  to bypass the need for an electron donor. **d**, Likewise, CAO does not show any activity on Chl *a* with  $\text{H}_2\text{O}_2$ . In the extracted ion chromatograms the  $m/z$  of 607.2551 and 885.5525 represent the mass of  $[\text{M}+\text{H}]^+$  of Chlorophyllide *b* and Chlorophyll *b* minus  $\text{Mg}^{2+}$  plus  $2\text{H}^+$ , respectively. All data was performed in triplicate.

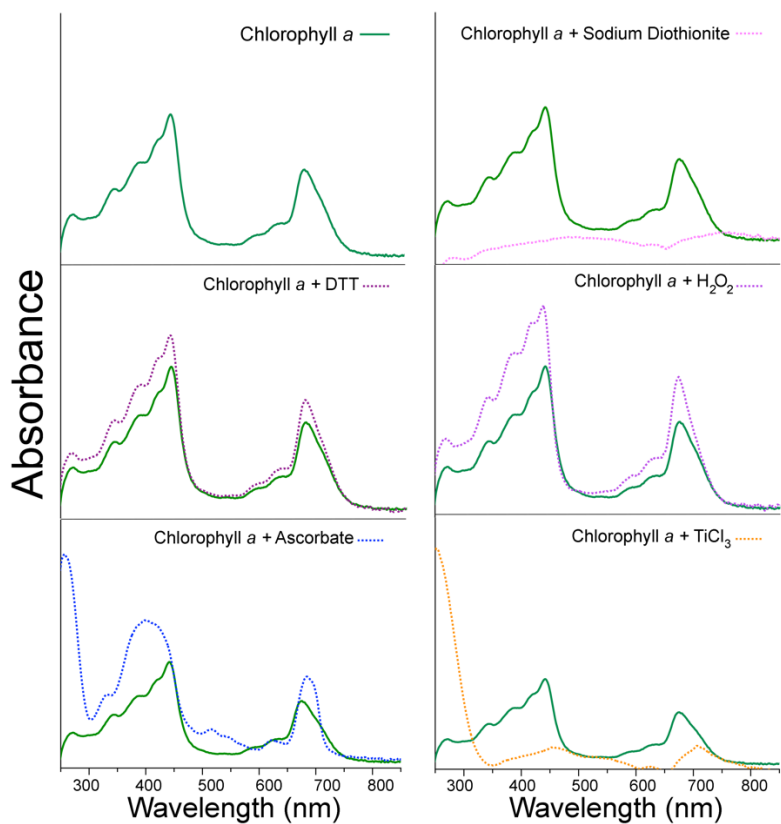

**Supplementary Figure 8.** The addition of 1 mM sodium dithionite, ascorbate, or TiCl<sub>3</sub> to 20 μM Chlorophyll *a* result in notable changes to the distinctive absorption peaks.

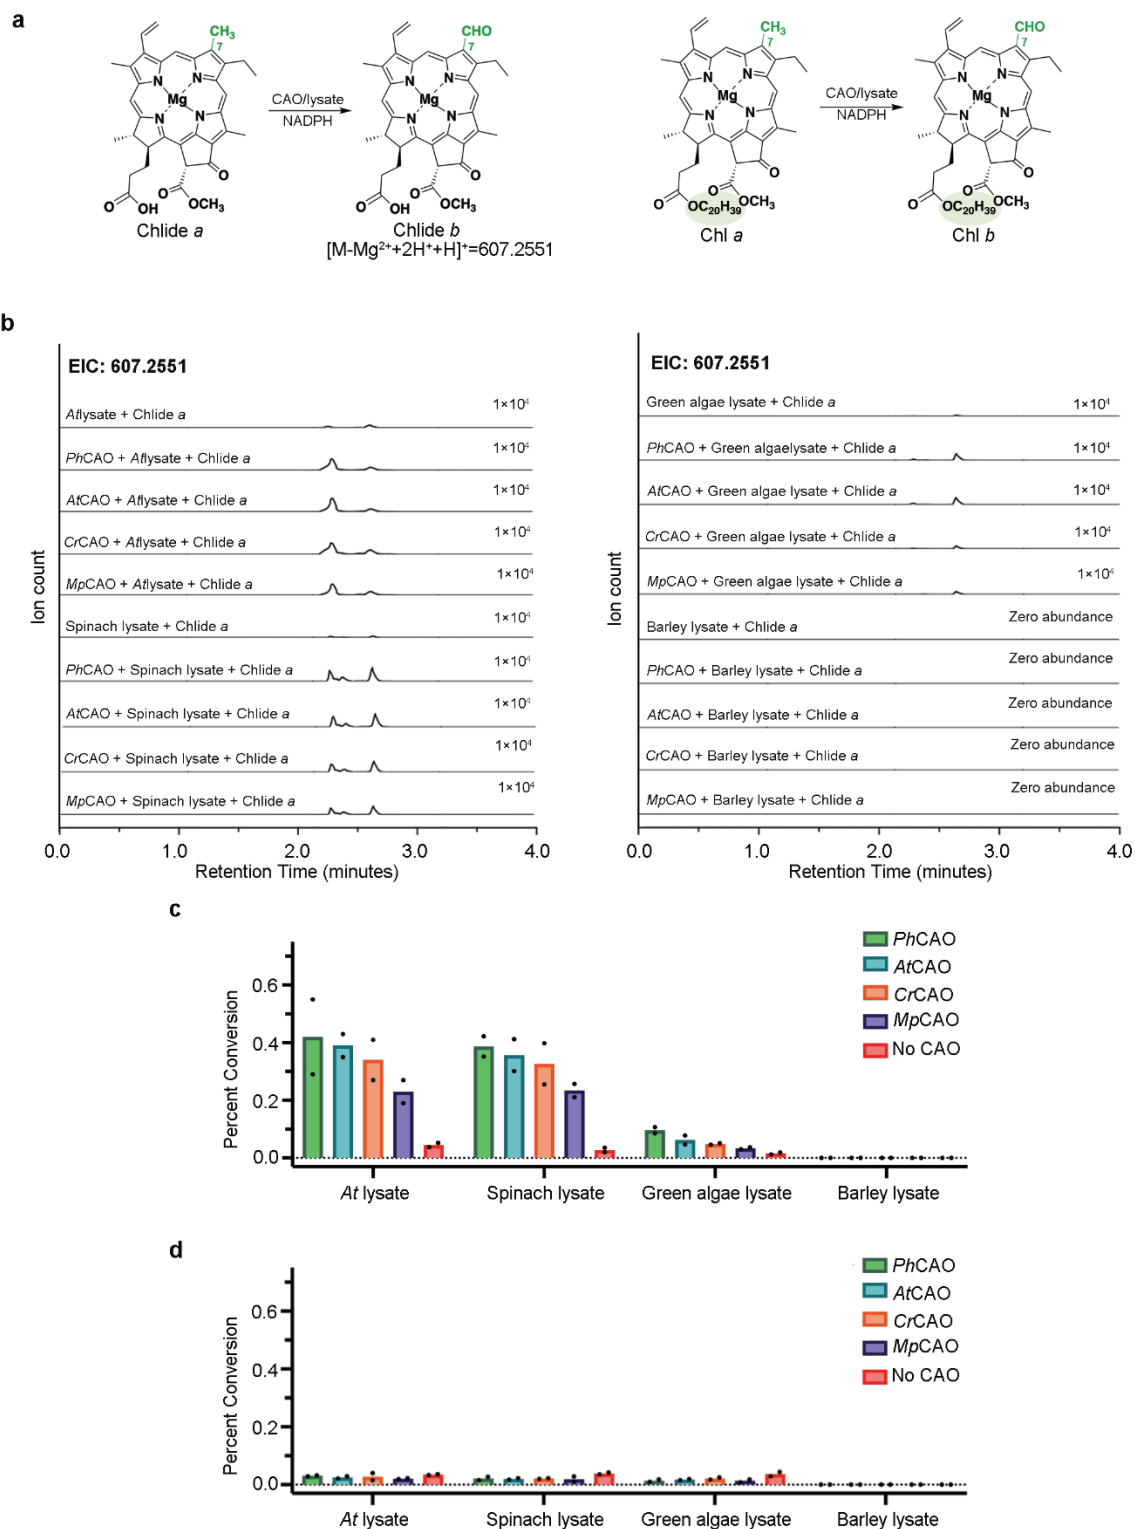

**Supplementary Figure 9.** Cell lysate from four different photosynthetic organisms was tested for its ability to support Chlide *b* production. **a**, Reaction scheme for the CAO catalyzed conversion of Chlide *a* into Chlide *b* or Chl *a* into Chl *b* in different cell lysates. **b**, The extracted ion chromatograms of the CAO-catalyzed reactions performed in cell lysate with a Chlide *a* substrate.

**c**, A bar chart to compare the activity of CAO homologs in different cell lysates using Chlide *a* as the substrate. Of note, *Arabidopsis thaliana* cell lysate allows for the highest production of Chlide *b* for each of the different CAO homologs. Spinach lysate shows similar level activity compared with *At* lysate. Green algae lysate, on the other hand, shows much lower activity. Finally, barley lysate failed to support the ability of any CAO homolog to produce Chlide *b*. **d**, A bar chart to compare the activity of CAO homologs with different cell lysates using Chl *a* as the substrate. None of the tested cell lysates shows the ability to support any of the CAO homologs to transform Chl *a* into Chl *b*. All data in the bar graph was measured in duplicate and are shown as mean values  $\pm$  SD.

**a Pyridine-mediated reaction**

R= CH<sub>3</sub> (chlorophyllide *a*) or R=CHO (chlorophyllide *b*)

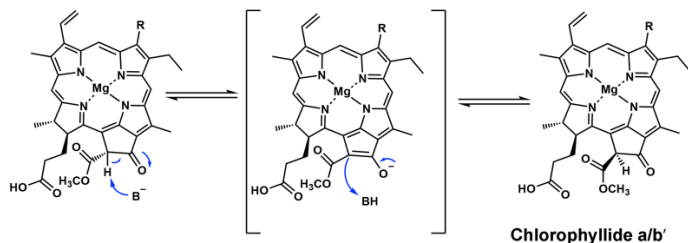

**b Acid-catalyzed reaction**

R= CH<sub>3</sub> (chlorophyllide *a*) or R=CHO (chlorophyllide *b*)

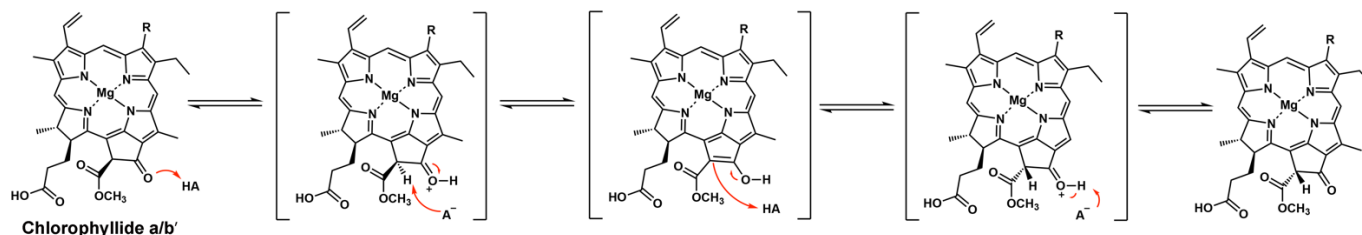

**Supplementary Figure 10.** The stereochemistry at the C-13<sup>2</sup> position of Chl pigments can be changed using acid-base chemistry. (a) Proposal for the pyridine catalyzed conversion of Chlorophyllide *a* or *b* into Chlorophyllide *a'* or *b'*. Here, pyridine abstracts the proton from the C-13<sup>2</sup> position of Chl to form an enolate anion. (b) Proposal for the acid (HCl) catalyzed conversion of Chlorophyllide *a'* or *b'* into Chlorophyllide *a* or *b*.

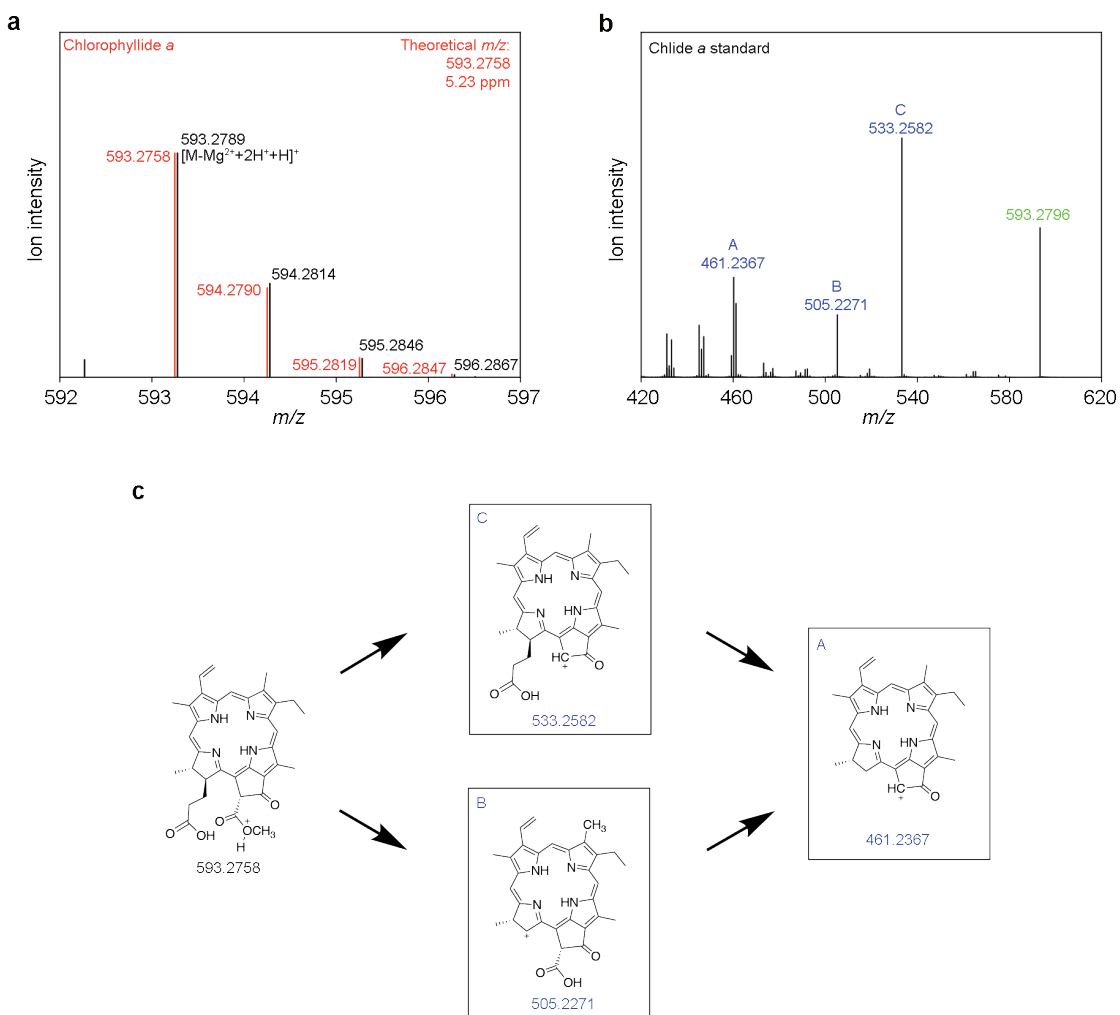

**Supplementary Figure 11.** Analysis of the enzymatically produced Chlide a standard. **a**, The predicted (red) and the observed (from the chlorophyllase reaction, black) isotope distribution for Chlide a show good agreement. **b**, MS/MS spectrum of the Chlide a standard shows three major fragments of interest, labelled as A, B and C. **c**, The proposed fragmentation pathway for Chlide a. Of note, the major fragments (C and A) have a mass loss of 60.0176 Da ( $C_2H_4O_2$ ) and 132.0391 ( $C_5H_8O_4$ ), suggesting that the side chains on C13<sup>2</sup> and C17 are relatively easy to dissociate.

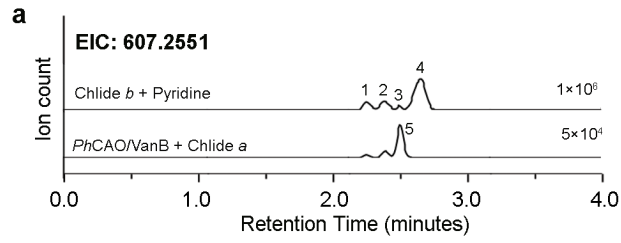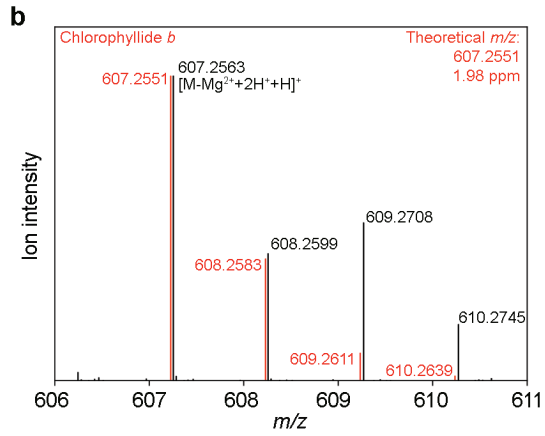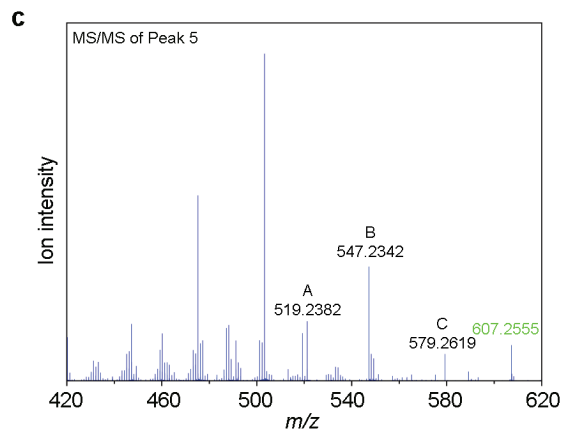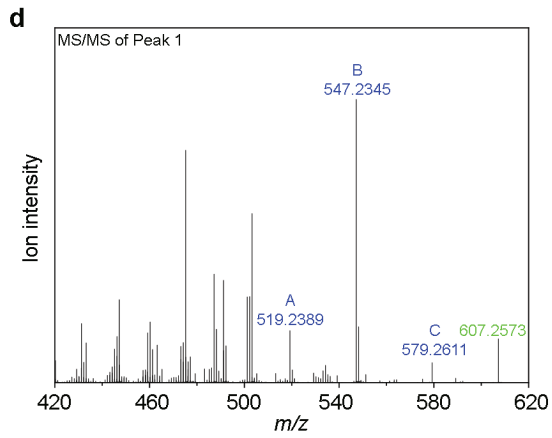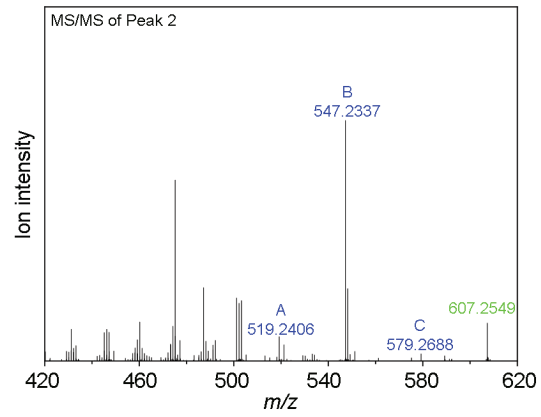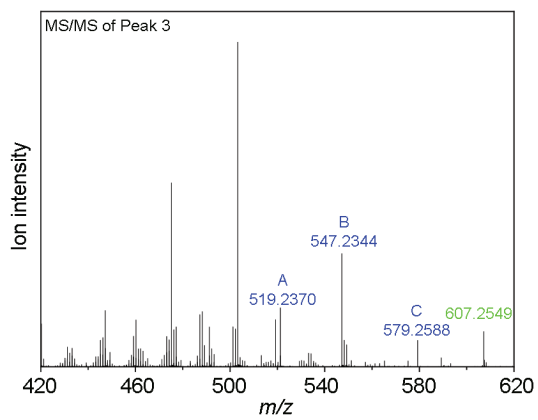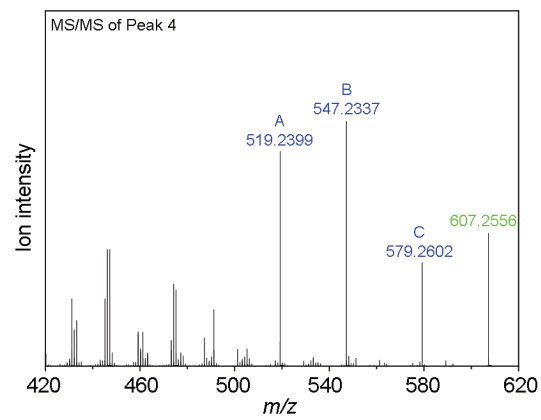

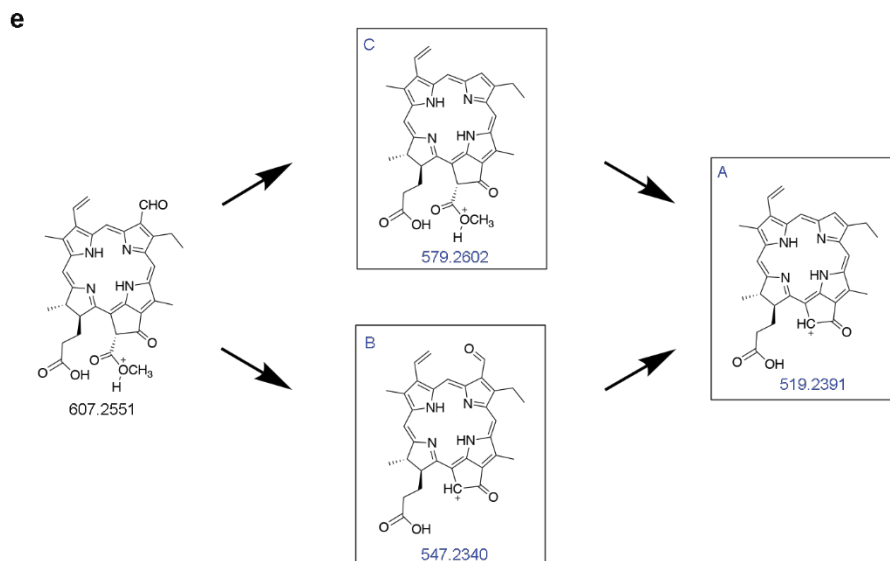

**Supplementary Figure 12.** Analysis of the enzymatically produced Chlide *b* standard and the product of the CAO reaction. **a**, Extracted ion chromatograms for the Chlide *b* standard and product of the *Ph*CAO reaction. There are four peaks shown in the Chlide *b* standard (labeled peaks 1-4) and the product peak of the *Ph*CAO reaction (peak 5) has the same retention time as peak 3 from the standard. **b**, The predicted (red) and observed (from the *Ph*CAO reaction, black) isotope distribution for Chlide *b* show good agreement. **c**, The MS/MS spectrum of peak 5 from the *Ph*CAO reaction. **d**, The MS/MS spectrum of peaks 1-4 from the Chlide *b* standard. Each of the peaks 1-4 show different fragmentation patterns consistent with them being diastereomers of Chlide *b*. Comparison of the retention time (panel a) and MS/MS spectrum of the product peak of the CAO reaction (panel c) with the Chlide *b* standard (panel d), suggests that the major product of the CAO reaction shows the same diastereomer configuration as peak 3 in the Chlide *b* standard. **e**, A proposed fragmentation pathway for Chlide *b* that gives rise to the fragments that are labeled A, B, and C, and are observed in all five MS/MS spectra. Fragment C, which demonstrates a mass loss of 27.9949 Da corresponds to the loss of a formyl group.

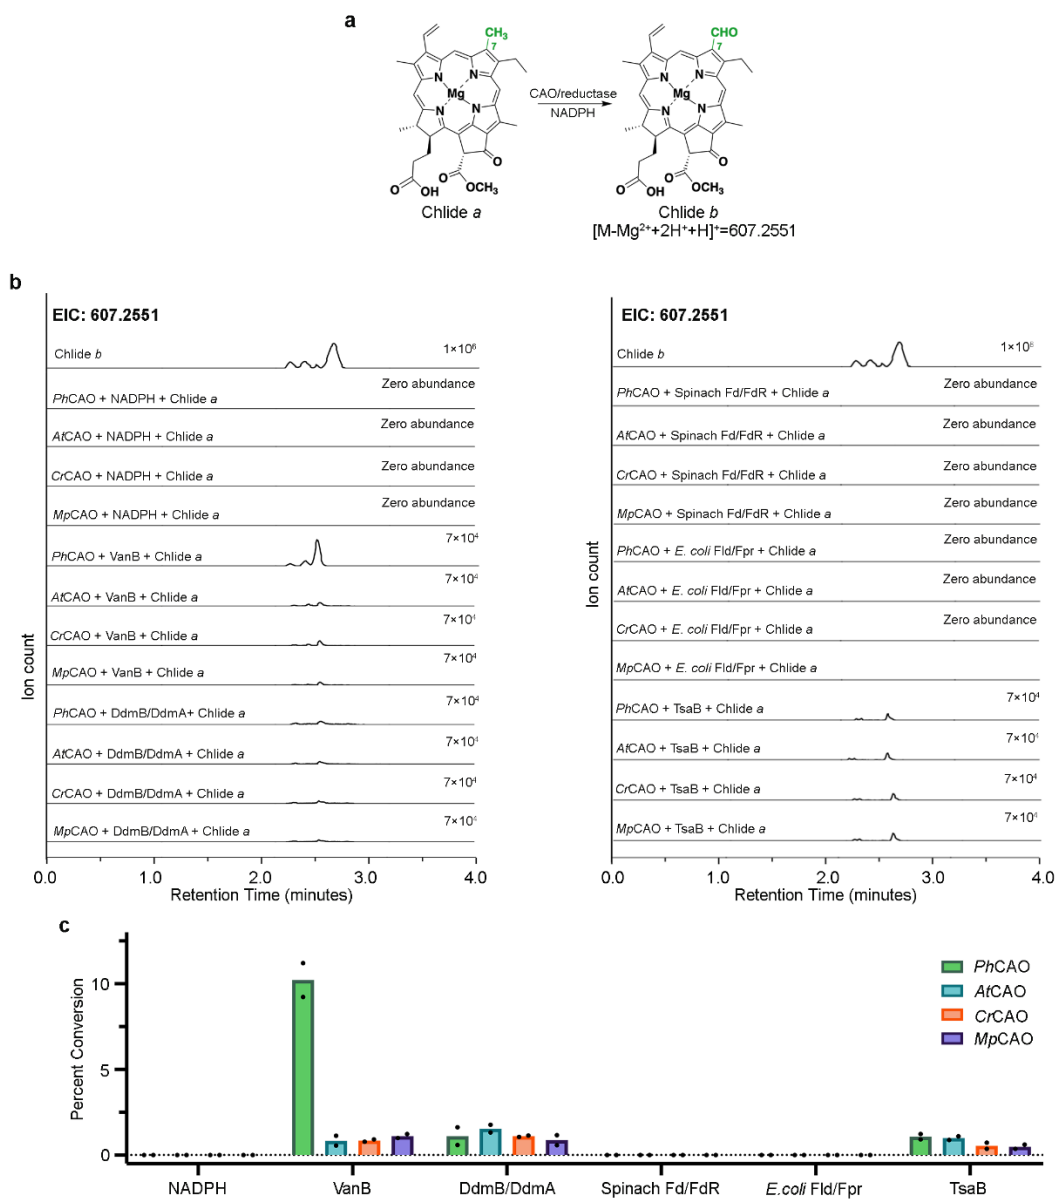

**Supplementary Figure 13.** Five different non-native reductase systems were tested for their ability to support Chlide *b* production. **a**, Reaction scheme of the CAO catalyzed conversion of Chlide *a* into Chlide *b* with NADPH and different reductase systems. **b**, The extracted ion chromatograms of the products from the CAO reactions that were performed using NADPH and five different reductases (VanB, DdmB/DdmA, Spinach ferredoxin/ferredoxin reductase, *E. coli* flavodoxin/flavodoxin reductase, and TsaB). **c**, A bar chart to compare the activity of the CAO homologs with NADPH and the different tested reductases. VanB, the reductase partner of a Rieske oxygenase, vanillate *O*-demethylase, shows the highest activity among all tested reductase systems. All data in the bar graph was performed in duplicate and are shown as mean values  $\pm$  SD.



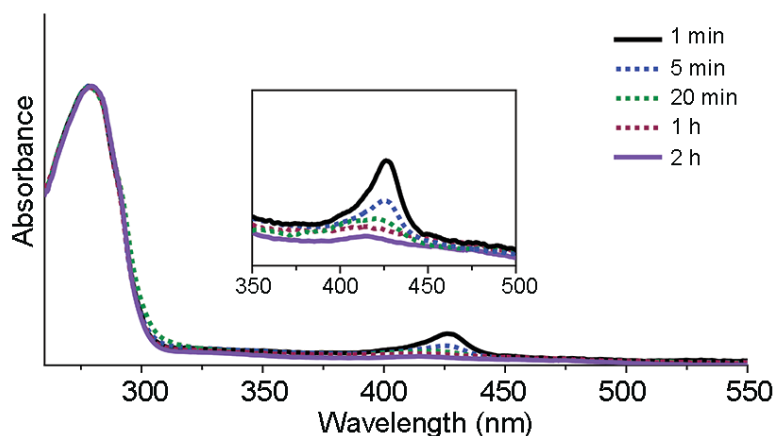

**Supplementary Figure 14.** The UV-Vis absorption spectra of the Rieske [2Fe-2S] cluster in *PhCAO* shows that it can be reduced by the non-native reductase VanB over time.

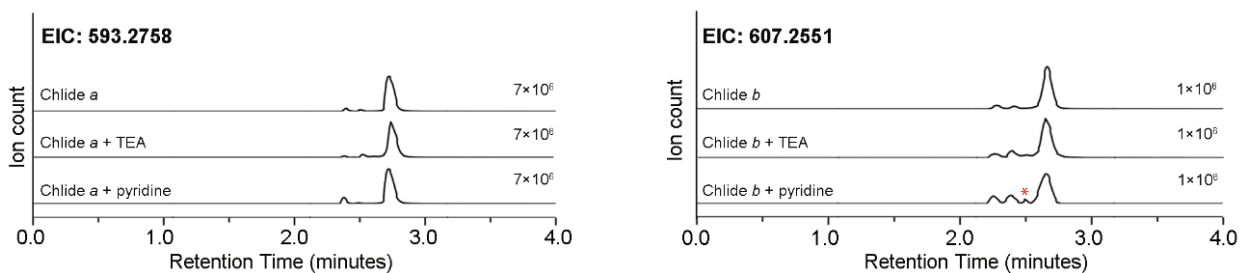

**Supplementary Figure 15.** The diastereomer distribution of Chlide *a* (left) and Chlide *b* (right) can be shifted by triethylamine (TEA) or pyridine. The peak observed in the Chlide *b* with pyridine reaction that matches the product peak in CAO reaction is labelled with a red asterisk. The  $m/z=593.2758$  and  $m/z=607.2551$  represents the  $[M+H]^+$  of Chlide *a* and Chlide *b* minus  $Mg^{2+}$  plus  $2H^+$ , respectively.

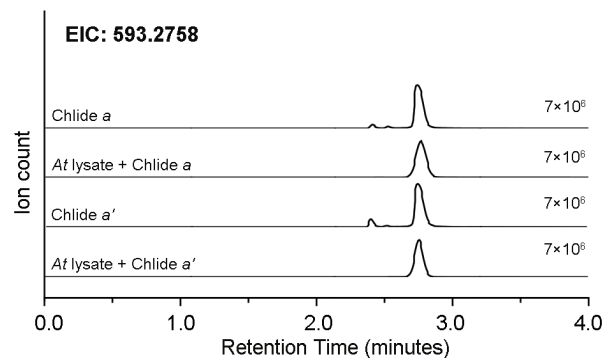

**Supplementary Figure 16.** The diastereomer equilibrium of the Chlide *a* and Chlide *a'* can be shifted by *A. thaliana* cell lysate.

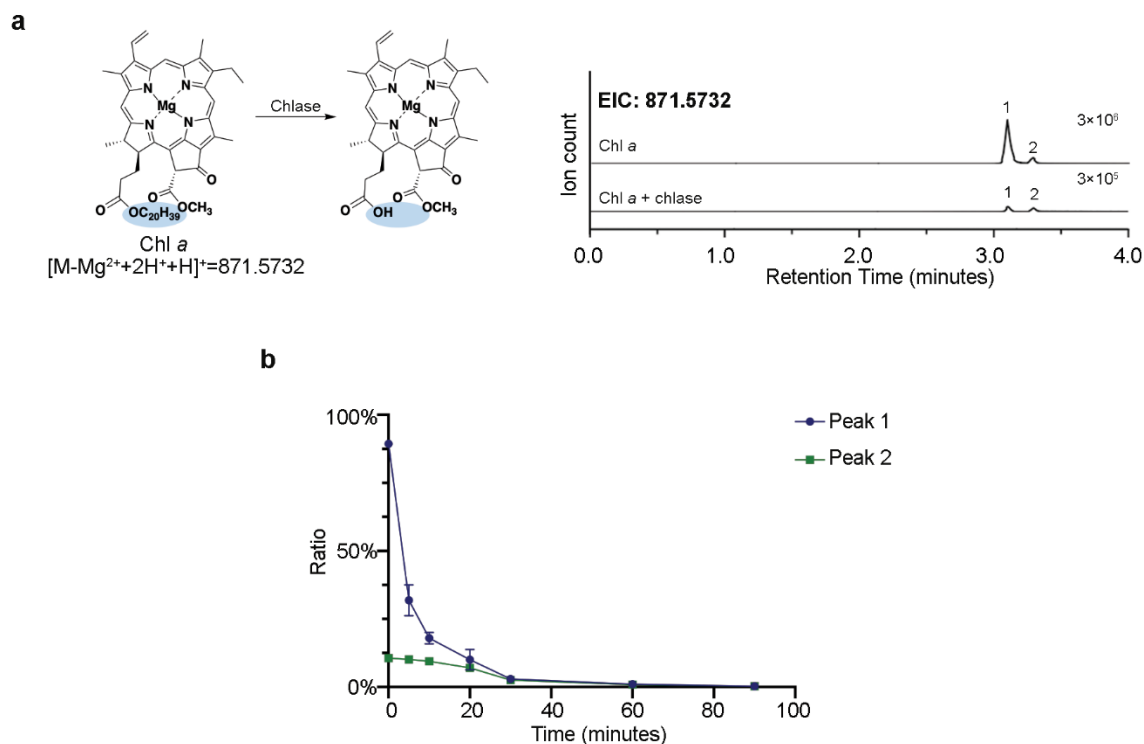

**Supplementary Figure 17.** A certain diastereomer of Chl *a* is preferred by chlorophyllase. **a**, Reaction scheme and the extracted ion chromatograms of the substrate (Chl *a*) from the hydrolysis reaction catalyzed by chlorophyllase (abbreviated chlase). **b**, A time dependent measurement of the consumption of the two diastereomers present in the Chl *a* standard. The diastereomer of peak 1 is preferred by chlorophyllase although both diastereomers are mostly consumed after the 1 hour incubation.

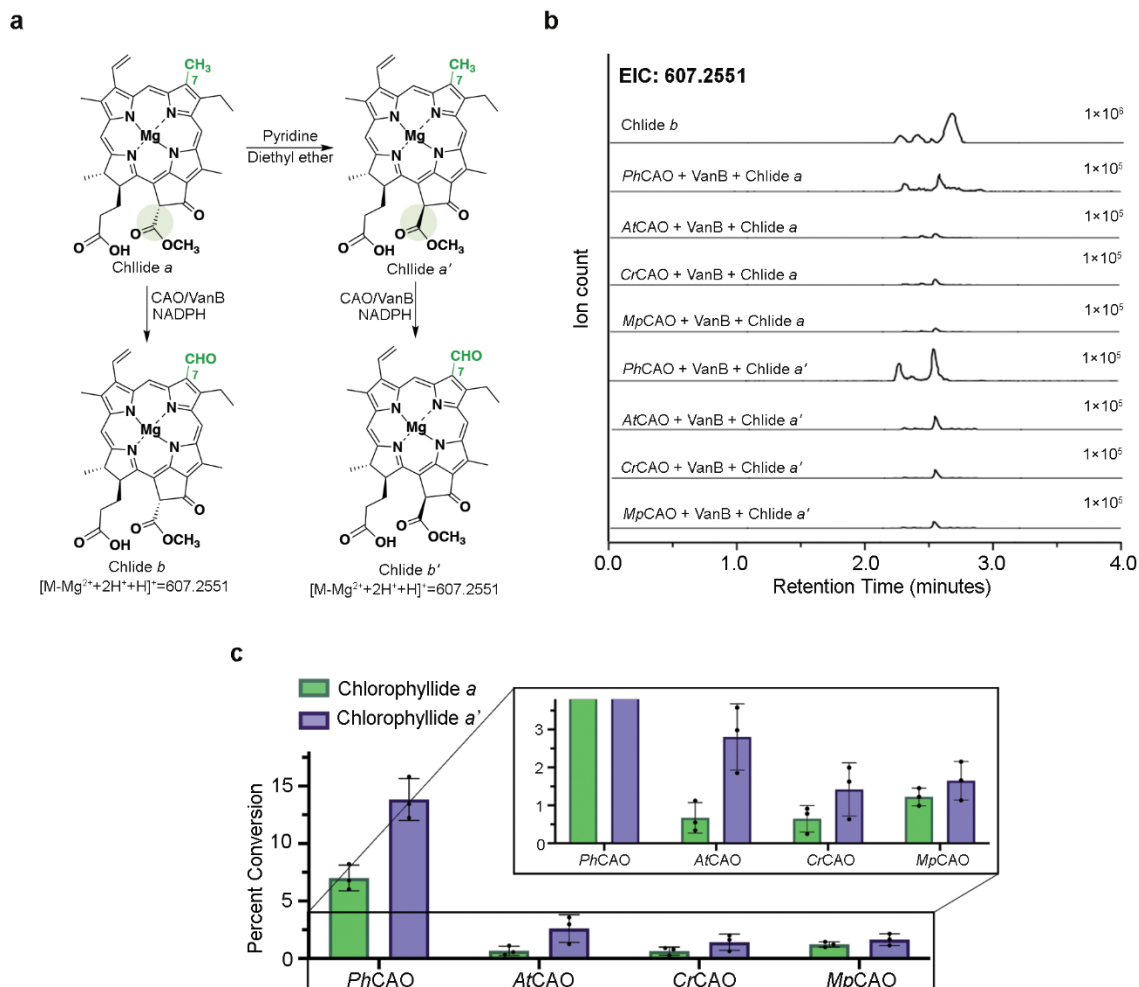

**Supplementary Figure 18.** The Chlide a' diastereomer is preferred by all tested homologs of CAO. **a**, Reaction scheme that shows the pyridine-mediated transformation of Chlide a into Chlide a'. **b**, The extracted ion chromatograms of the CAO reaction product using either Chlide a or Chlide a' as a substrate. **c**, A bar chart to compare the percent yield of CAO homologs with Chlide a and Chlide a'. This data revealed that all four homologs show a preference for Chlide a' rather than Chlide a. All data points were measured in triplicate and are shown as mean values  $\pm$  SD.

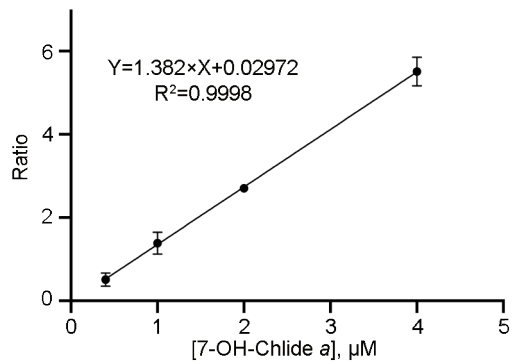

**Supplementary Figure 19.** A standard curve for the Q-TOF LC-MS data was used to determine the amount of intermediate (7-OH-Chlorophyllide *a*) in the reactions. The x-axis is the concentration of 7-OH-Chlorophyllide *a* whereas the y-axis is the ratio of the peak area integration of the 7-OH-Chlorophyllide *a* to the 1,3,5-trimethoxybenzene (0.5 mM) internal standard. All data points were measured in duplicate.

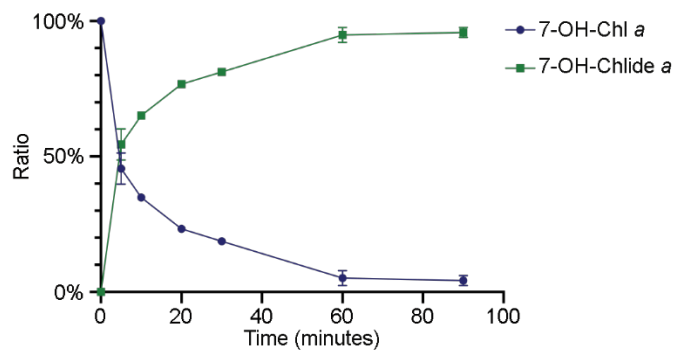

**Supplementary Figure 20.** Chlorophyllase can be used as a tool to produce a 7-OH-Chlide *a* standard. A time dependent measurement of 7-OH-Chl *a* (1 mM, blue) consumption and 7-OH-Chlide *a* production using chlorophyllase (1.5 μM, green) shows that the chlorophyllase reaction reaches the maximum amount of substrate conversion at 1 hour. At this time point, approximately 95-percent of the 7-OH-Chl *a* has been converted into 7-OH-Chlide *a*. All data points were measured in duplicate.

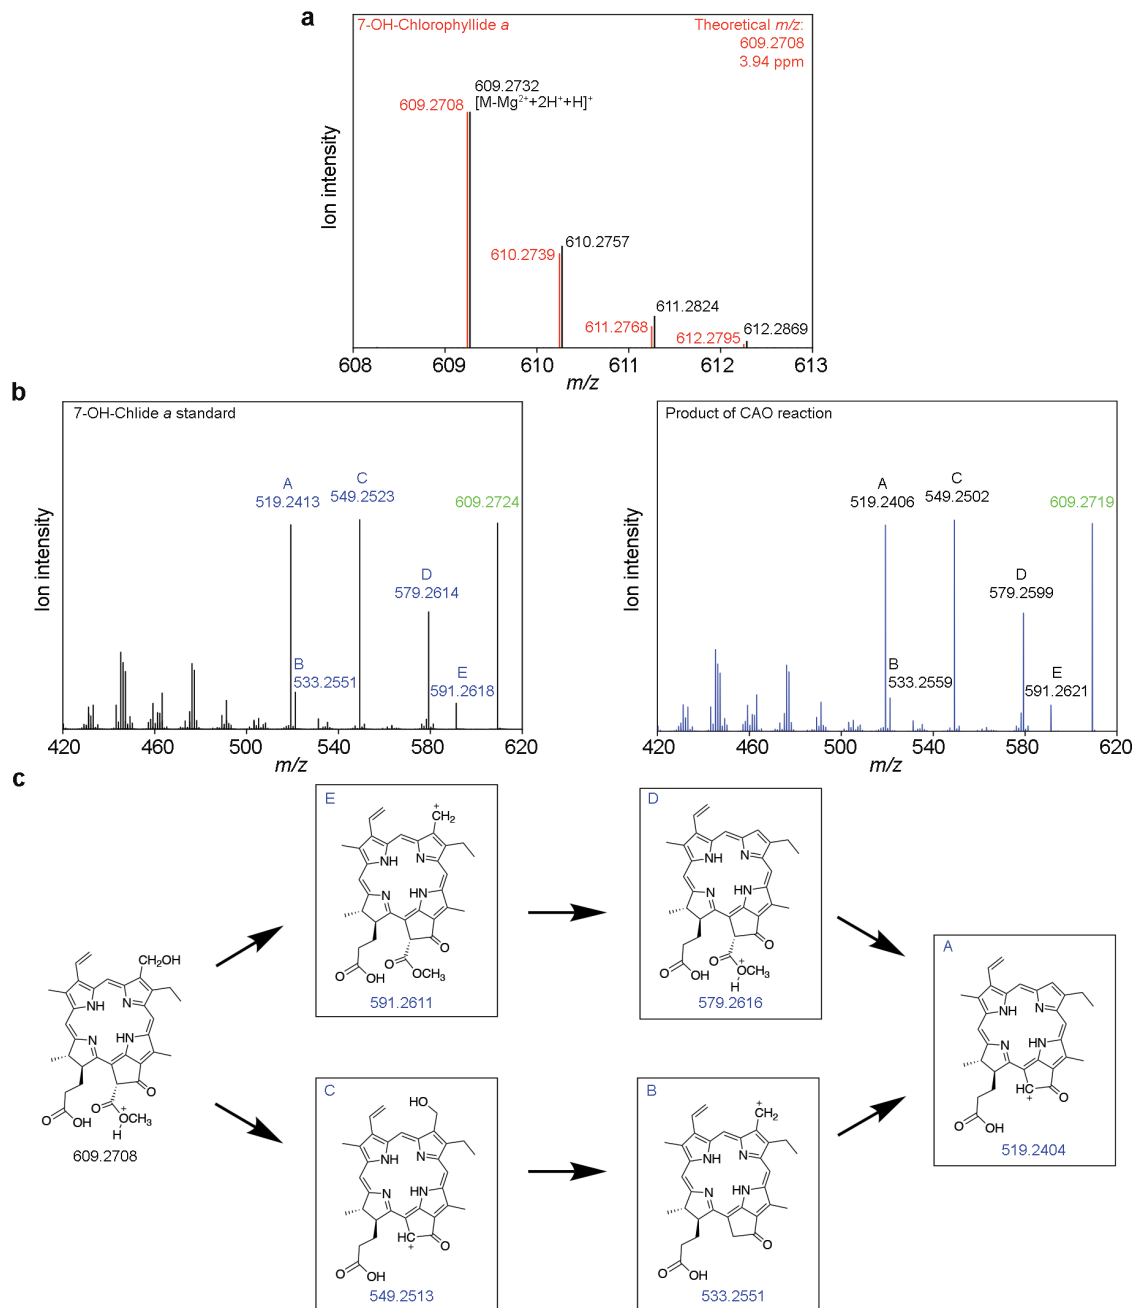

**Supplementary Figure 21.** Analysis of the chemically produced 7-OH-Chlide *a* standard and the intermediate produced in the CAO reaction. **a**, The predicted (red) and observed (from the *Ph*CAO reaction, black) isotope distribution for 7-OH-Chlide *a* show good agreement. **b**, The MS/MS spectrum of the produced 7-OH-Chlide *a* standard (left panel) is compared to the MS/MS spectrum of the proposed 7-OH-Chlide *a* intermediate from the *Ph*CAO reaction (right panel). **c**, Proposed fragmentation pathway for 7-OH-Chlide *a*. The existence of fragments D and E are consistent with the presence of a hydroxymethyl group in the compound being tested due to the mass loss of 18.0097 Da (H<sub>2</sub>O) and 30.0092 Da (CH<sub>2</sub>O).

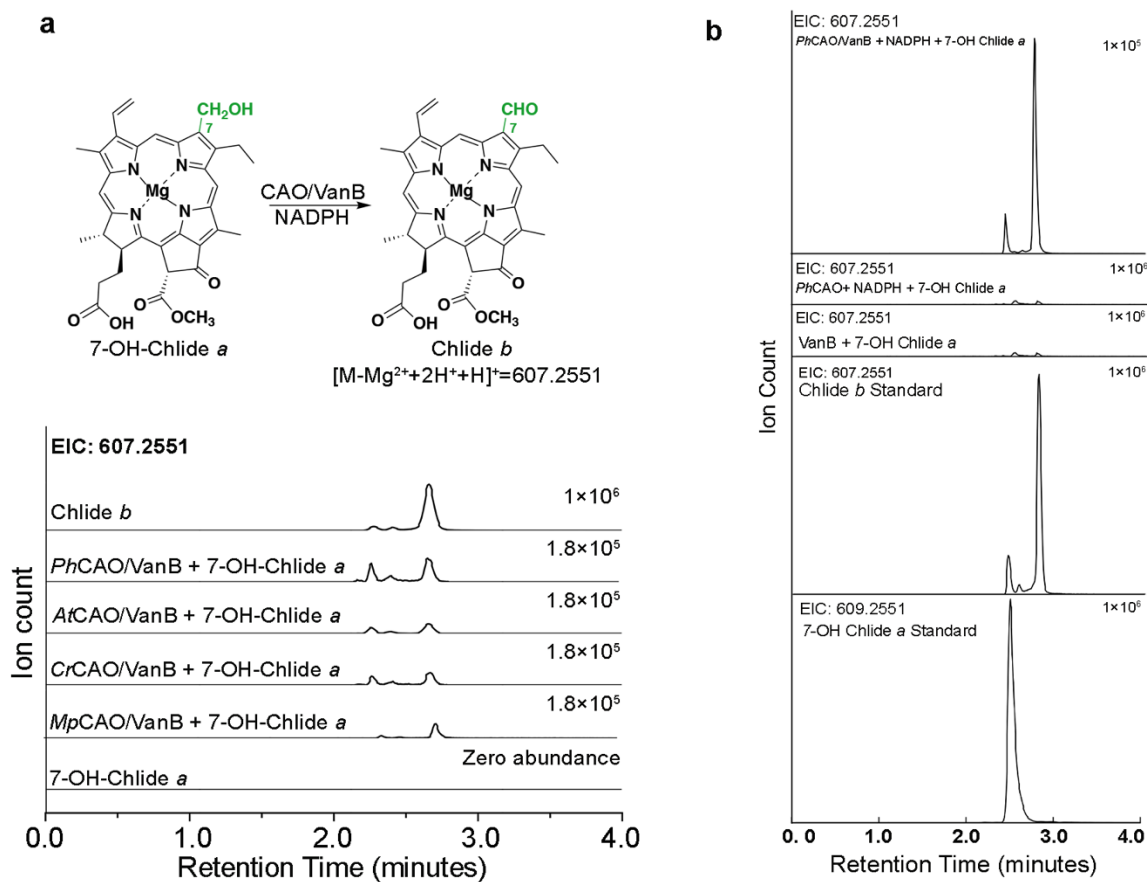

**Supplementary Figure 22.** Extracted ion chromatograms for the CAO homolog reaction products formed when CAO was combined with VanB, NADPH, and a 7-OH-Chlide *a* substrate. **a**, These traces reveal that 7-OH-Chlide *a* can be converted into Chlide *b*. **b**, These traces reveal that in the absence of CAO or VanB, the expected Chlide *b* product is not formed which means that to convert the intermediate into the product, both enzymes are needed.

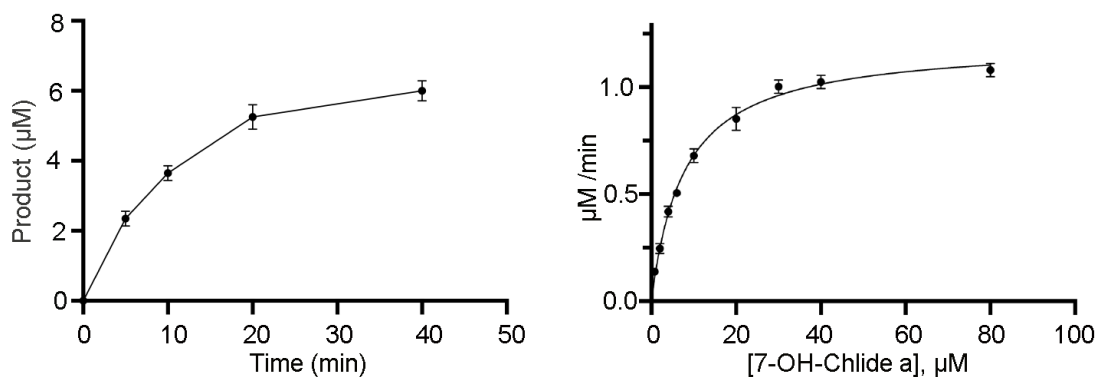

**Supplementary Figure 23.** Steady state kinetic behavior of *PhCAO* with a 7-OH-Chlide *a* substrate. A time course of *PhCAO* with a 7-OH-Chlide *a* substrate was measured to find the linear range of product formation (left panel). This data demonstrates that 5 min is an optimal time to capture the initial reaction rate. The steady-state kinetics of *PhCAO* with the 7-OH-Chlide *a* substrate was fitted to the Michaelis-Menten equation with  $K_M = 7.8 \pm 0.9 \mu\text{M}$  and  $V_{\text{max}} = 1.2 \pm 0.1 \mu\text{M min}^{-1}$  (right panel). All data points in this figure were measured in duplicate.

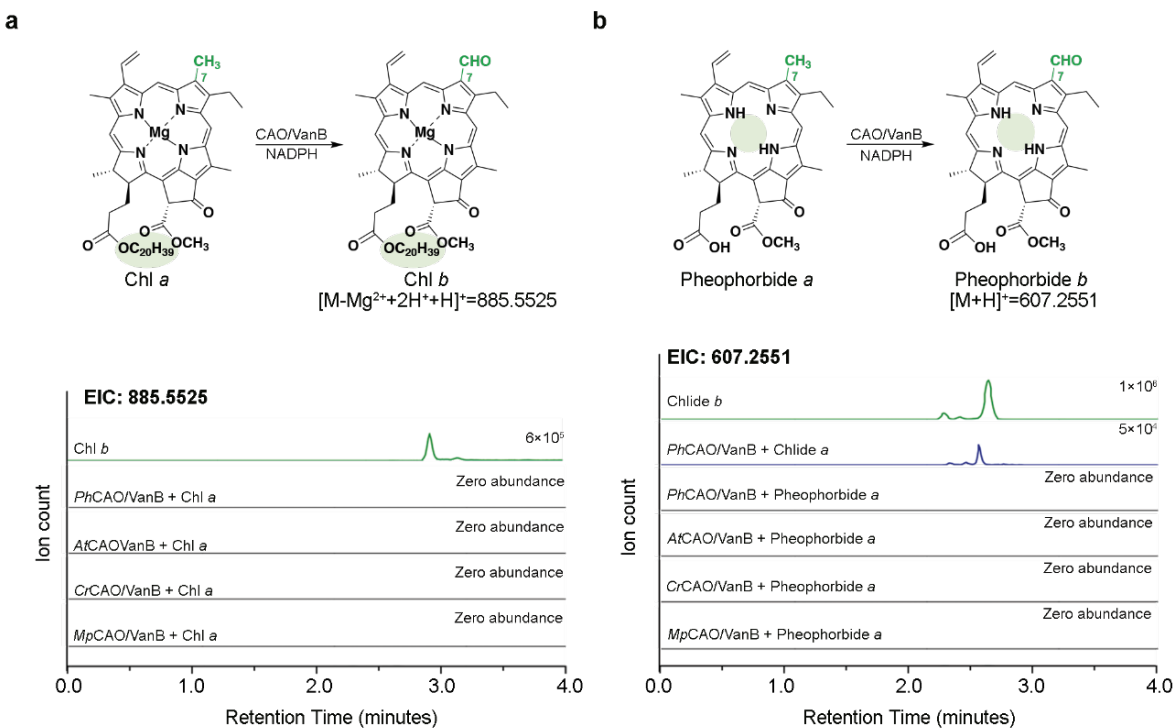

**Supplementary Figure 24.** Chlorophyll a and Pheophorbide a are not substrates of the CAO homologs. **a**, An extracted ion chromatogram of the expected product of a CAO-VanB-catalyzed reaction with a Chlorophyll a substrate does not reveal production of a hydroxylated product, suggesting the long phytol group of Chlorophyll a, relative to Chlide a, impairs the activity of CAO. **b**, Similarly, none of the CAO homologs show production of a hydroxylated product when provided with a Pheophorbide a substrate, suggesting that the central metal ion ( $\text{Mg}^{2+}$ ) is also important for CAO activity.



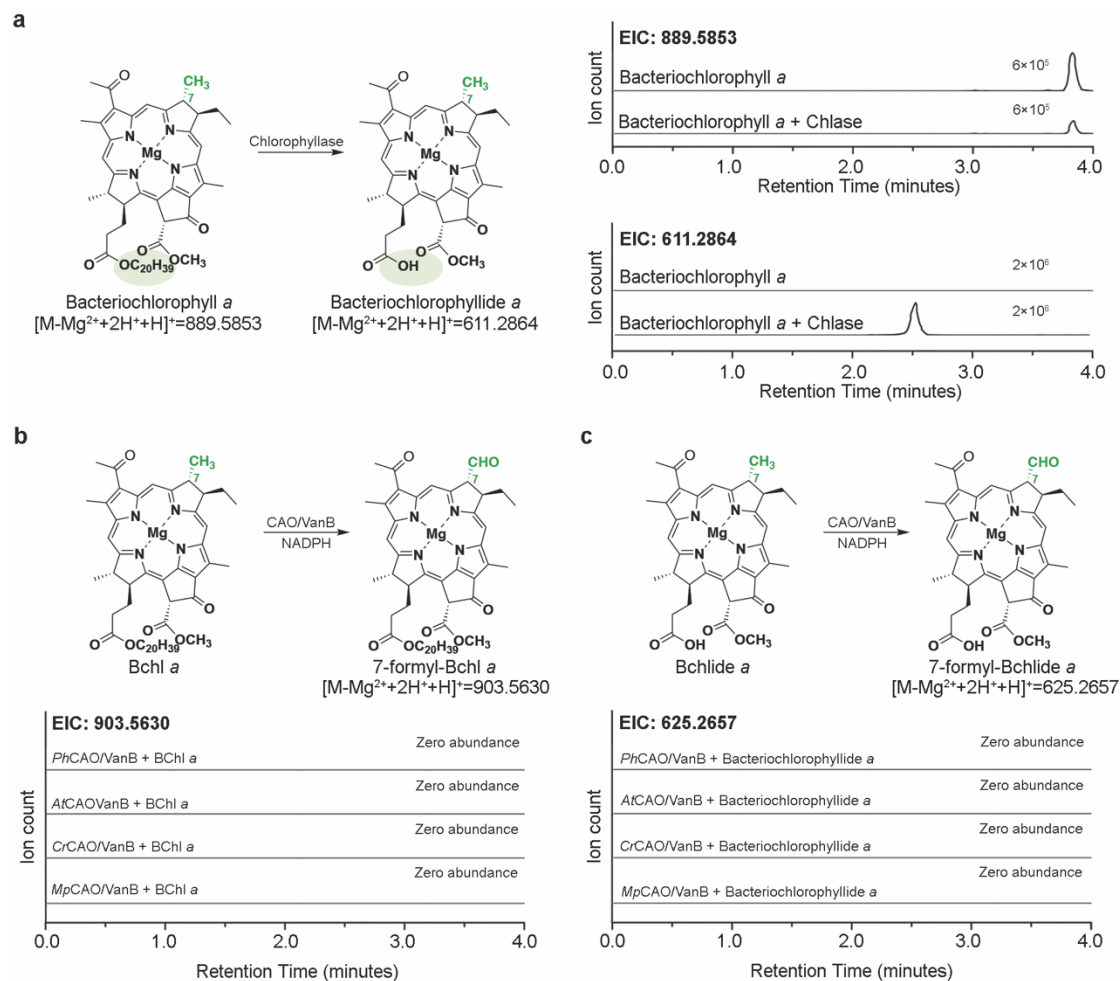

**Supplementary Figure 25.** The activity of the CAO homologs was tested on Bacteriochlorophyll *a* and Bacteriochlorophyllide *a* substrates. **a**, Chlorophyllase was demonstrated to hydrolyze the phytol tail of Bacteriochlorophyll *a* to produce Bacteriochlorophyllide *a*. **b**, The extracted ion chromatograms of the CAO-VanB reaction products when incubated with a Bacteriochlorophyll *a* substrate reveals that none of the CAO homologs accept Bacteriochlorophyll *a* as a substrate. **c**, Similarly, the CAO homologs do not show activity on Bacteriochlorophyllide *a* using VanB as a reductase. Collectively, these data suggest that substrates that contain a bacteriochlorin scaffold cannot be oxidized by CAO.

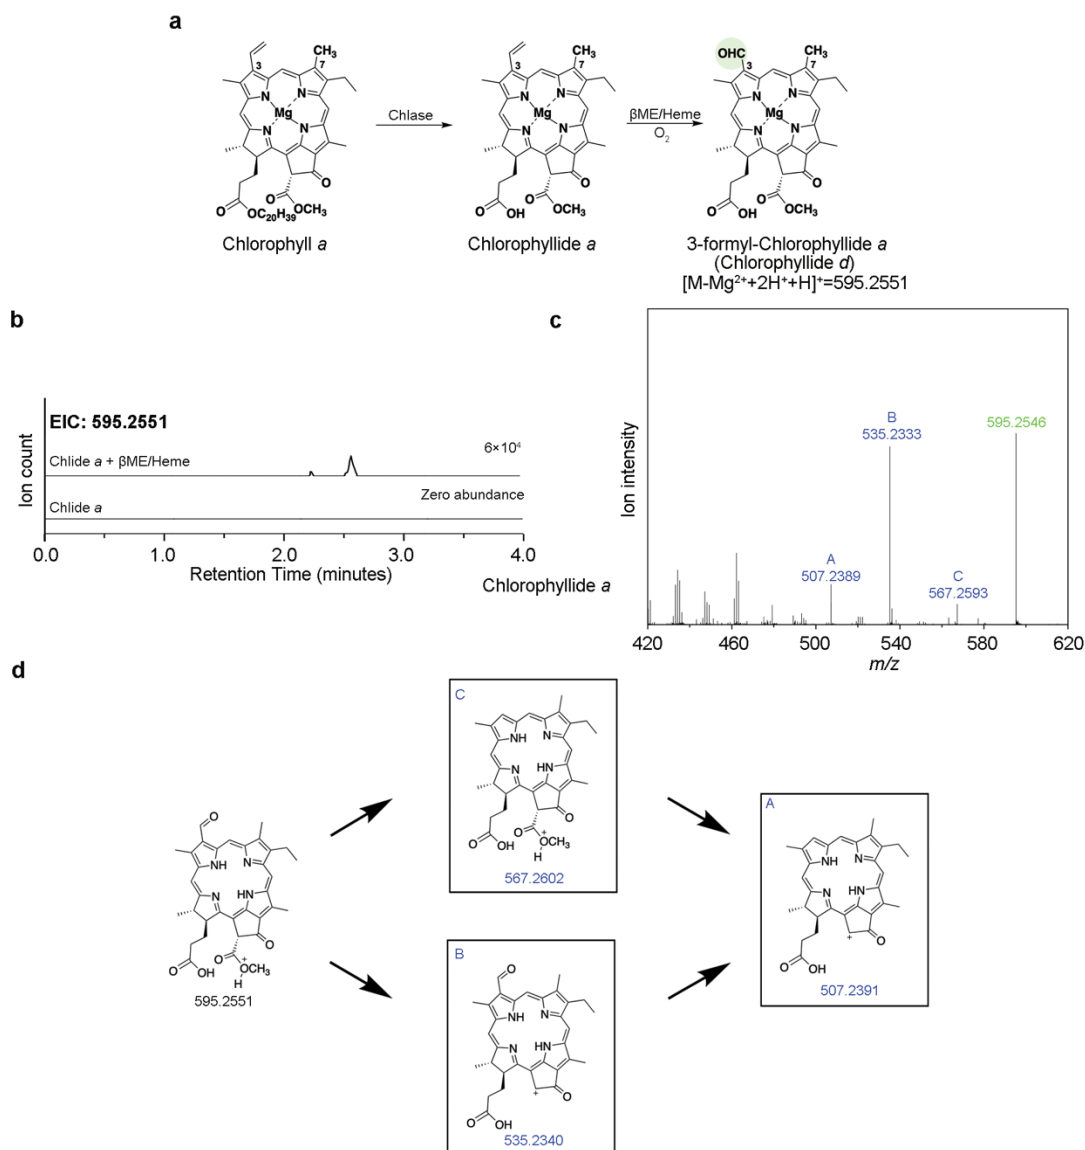

**Supplementary Figure 26.** Analysis of the chemically produced Chlide *d* (3-formyl-Chlide *a*). **a**, Reaction scheme of enzymatic and chemical synthesis of Chlide *d*. **b**, Extracted ion chromatogram of the product formed by following the published methods for using  $\beta$ -mercaptoethanol ( $\beta$ ME) and heme to convert Chlide *a* into Chlide *d*<sup>2</sup>. **c**, MS/MS spectrum Chlide *d* shows three major fragments of interest, labelled as A, B and C. **d**, A proposed fragmentation pathway for Chlide *d*. Fragment C, which demonstrates a mass loss of 27.9949 Da corresponds to the loss of a formyl group.

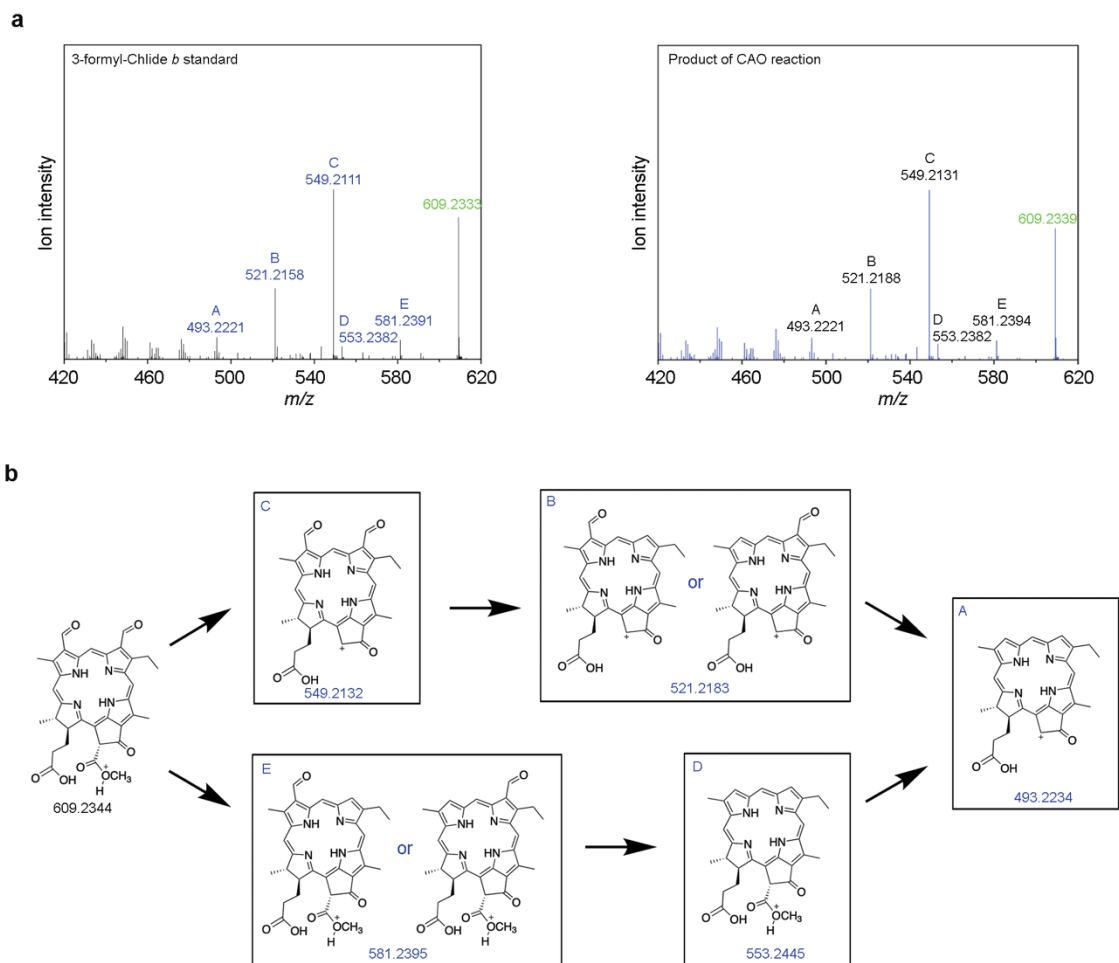

**Supplementary Figure 27.** Analysis of the 3-formyl-Chlide *b* produced in the CAO reaction. **a**, The MS/MS spectrum of produced 3-formyl-Chlide *b* standard (left panel) is compared to the MS/MS spectrum of the 3-formyl-Chlide *b* from the *Ph*CAO reaction (right panel). **b**, Proposed fragmentation pathway for 3-formyl-Chlide *b*. The existence of fragments D and E are consistent with the presence of two formyl groups in the compound being tested due to the mass loss of 27.9949 Da (CO) and 55.9899 Da (C<sub>2</sub>O<sub>2</sub>).

## II. Supplementary Methods

### IIa. DNA and protein sequences

#### **Prochlorothrix hollandica Chlorophyllide a oxygenase (PhCAO):**

UniProt: A0A0M2PSM7

ATGAATAATAGCCTCAACGTATCCGCAACCCTAGATTTAGCGAACGGATTACGCAACTTTTGGTATCCCGTTGA  
GTTTTCTAAGAAATTTGGGGATGGCGGATCCCTTGGGCTTCGAGTTATTTGATCAATGTTGGGTTTTGTTTCGCG  
ATGATCAGGGAAC TGCCGCCTGTATTCTGGATGAATGTGCCACCGCGCTTGTCCCCTATCCCTGGGCAAGGTG  
ATCCAAGGGCGGATCCAGTGCCCCTACCATGGTTGGGAGTACGATCGCCAGGGGGAGTGTGTCCATATGCCCTC  
CTGCCAAGCCATCAGCAATCCAATTTTGACCTTGCCAGTGATGGAGCAAGGGGGCATGATTTGGGTTTGGCCCCG  
GAACCGACGAGCCAGGTGCCTTGCCATCCTTAGCCCCACCCTACCGGACAATTTACCCTCCAGGCTGAATTG  
GTGATGGATTTGGAGGTGGAGCATGGCTTAATGCTGGAAAACCTCTTAGATCTCGCCATGCCCCCTTACCCA  
CACCGGCACCTTTGCCAAGGGCTGGCCCGTCCCCCTTTTGTCCGGTTTGCCAATGCTGCCACCACACCCTGGA  
CCGGGCACTGGGATCCCTATCCATCCACATGACCTTTGAACCCCTTGCTTTGTCAATTAGCACCATCGGCTTG  
CGGGGCAAAGACTGTGGCCGCATCTGCATCAGGTTACGCCTGTCTCCCTCGGGGCCAGGGGCGCACTCGCTT  
GCTCTACCGCTTAGCCTTAGATTTTGGCCACTGGTTACGCTGGGTTCCGGGGACCCATTGTCTCTGGCAACATT  
TGGCCAACCGAGTCATCCAGGAAGACTTACGCTTAGTCCAGGGCCAACAGGAGCGTCTCAAGGGGGGGGCTAAT  
GTGTGGAACCAACCCGTGGGCTATGACAAGTTGGGGGTGGCCTATCGCCACTGGCGCAATCAAGTGGAAACGCCA  
CGGTTCTGACTGGCCTGAATCTCCCCTGATGAGGGTAGGGAGCCTGCTCTCAATGCGATCGTCACGGGGTCAG  
ATGCTCCGATCACGGGTTCTGTGGTTTCCCTGCCGCCGTCCCAGGCTCCTCCCACGGGGCACTGA

MNNSLNVSATLDLANGLRNFWYPVEFSKNLGMADPLGFELFDQCWVLFRRDDQGTAAACILDECAHRACPLSLGKV  
IQGRIQCPYHGWEYDRQGEVHMPSQQAISNPILTLVMEQGGMIWVWPGTDEPGALPSLAPTLDPDNFTLQAEL  
VMDLEVEHGLMLENLLDLAHAPFHTGTFAKGWVPPFVRFANAATTPWTGHWDYPYIHMTFEPFVISTIGL  
RGKDCGRHLHQVHACLPRGQGRTRLLYRLALDFGHWRWVPGTHCLWQHLANRVIQEDLRLVQGGQERLKGAN  
VWNQPVGYDKLGVAYRHRWNQVERHGSWPESPADEGREPALNAIVTGS DAPITGSVSVSLPPSQAPPTGH

#### **Chlamydomonas reinhardtii Chlorophyllide a oxygenase (CrCAO)**

UniProt: Q9ZWM5

ATGCTGCCGGCGAGCCTGCAGCGTAAAGCGGCGGGTGGTGGCCGTGGTCCGACCAACCAGAGCCGTGTGGC  
GGTTCGTGTGAGCGCGCAACCGAAAGAGGCGCCGGCGGAGCACCCCGATCGTGGAGGATCCGGAAAGCAAGT  
TCCGTCGTTACGGTAAACACTTTGGTGGCATTCAACAAGCTGAGCATGGACTGGCTGGATAGCGTTCCGCGTGT  
CGTGTGCGTACCAAAGACAGCCGTCAGCTGGACGATATGCTGGAGCTGGCGGTGCTGAACGAACGCTTGGCGGG  
TCGTCTGGAGCCGTGGCAGGCGCGTCAAAGCTGGAATACCTGCGTAAGCGTCGTAAAACTGGGAGCGTATCT  
TCGAATATGTTACCCGTCAAGATGCGGCGGGCACCCTGGCGATGATTGAGGAAGCGAACCCTAAGGTGGAGGAA  
AGCCTGAGCGAGGAAGCGCGTGAGAAAACCGCGGTTGGTGACCTGCGTGATCAGCTGGAAAGCCTGCGTGCGCA  
AGTGGCGCAGGCGCAAGAGCGTCTGGCGATGACCCAGAGCCGTGTGGAACAGAACCCTGCAACGTGTTAACGAGC  
TGAAGGCGGAAGCGACCACCCTGGAGCGTATGCGTAAGGCGAGCGACCTGGATATCAAAGAGCGTGAACGTATC  
GCGATTAGCACCGTTGCGGCGAAAGGTCCGCGGAGCAGCAGCAGCAGCGCGGGCGGGTGGAGCGCGCCGGCGAC  
CAGCGCGACCCTGACCGTTGAGCGTCCGGCGGGCACCACCGTGACCCAAGAAGTTCCGAGCACCAGCTACGGTA  
CCCCGGTTGATCGTGCGCCGCGTTCGTAGCAAAGCGGCGATCCGTCGTAGCCGTGGCCTGGAGAGCAGCATGGAA

ATTGAGGAAGGTCTGCGTAACTTCTGGTATCCGGCGGAATTTAGCGCGCTCTGCCGAAGGACACCCCTGGTGCC  
GTTTCGAGCTGTTTGGCGAACCGTGGGTATGTTCCGTGATGAGAAGGGTCAGCCGAGCTGCATTTCGTGATGAAT  
GCGCGCACCGTGGCTGCCCGCTGAGCCTGGGTAAAGTGGTTGAGGGCCAAGTTATGTGCCCGTACCACGGTTGG  
GAATTCAACGGTGATGGTGCCTGCACCAAGATGCCGAGCACCCCGTTTTGCCGTAACGTTGGCGTGGCGGCGCT  
GCCGTGCGCGGAGAAAGACGGTTTTATCTGGGTGTGGCCGGGTGATGGCCTGCCGGCGGAAACCCCTGCCGGACT  
TTGCGCAGCCCGGGAGGGCTTTCTGATCCACGCGGAAATTATGGTTGATGTGCCGGTTGAGCACGGTCTGCTG  
ATTGAAAACCTGCTGGATCTGGCGCATGCGCCGTTACCCACACCAGCACCTTTGCGCGTGGCTGGCCGGTGCC  
GGACTTCGTTAAGTTTCACGCGAACAAAGCGCTGAGCGGTTTTCTGGGACCCGTACCCGATCGATATGGCGTTTC  
AGCCGCGTGATGACCCTGAGCACCATCGGTCGCGCAACCGGGCAAGATTATGCGTGGTGTACCGCGAGC  
CAGTGCAAAAACCACCTGCACCAACTGCACGTGTGCATGCCGAGCAAGAAAGGTCACACCCGTCTGCTGTATCG  
TATGAGCCTGGATTTCTGCCGTGGATGCGTCACGTGCCGTTTTATCGACCGTATTTGGAAGCAGGTGGCGGCGC  
AAGTTCTGGGCGAGGATCTGGTGCTGGTTCTGGGTGAGCAAGACCGTATGCTGCGTGGTGGCAGCAACTGGAGC  
AACCCGGCGCCGTACGACAAACTGGCGGTGCGTTATCGTCGTTGGCGTAACGGCGTTAACGCGGAAGTGGCGCG  
TGTTTCGTGCGGGTGAACCGCCGAGCAACCCGGTGGCGATGAGCGCGGGCGAGATGTTACGCGTTGACGAAGACG  
ATATGGATAACAGCAGCGGTGAAAACCTGTATTTTCAGGGTAGCGGCAGCAGC

MLPASLQRKAAAVGGRGPTNQRSVAVRVSAQPKEAPPASTPIVEDPESKFRRYKHFHGGIHKLSMDWLDSVPRV  
RVRTKDSRQLDDMLELAVLNERLAGRLEPWQARQKLEYLRKRKNWERIFEYVTRQDAAATLAMIEEANRKVEE  
SLSEEAREKTAVGDLRDQLESRAQVAQAQERLAMTQSRVEQNLQRVNELKAEATTLERMRKASDLDIKERERI  
AISTVAAKGPASSSSSAAAVSAPATSATLTVERPAATTVTQEV PSTSYGTPVDRAPRRSKAAIRRSRGLESSME  
IEEGLRNFWYPAEFSARLPKDTLVPFELFGEPWVMFRDEKQPS CIRDECAHRGCP LSLGKVVEGQVMCPYHGW  
EFNGDGACTKMPSTPFCRNVGVAALPCA EKDFIWVWPGDGLPAETLPDFAQPPEGFLIHAEIMVDVPEHGLL  
IENLLDLAHAPFTHSTFARGWPVPDFVKFHANKALSGFWD PYPIDMAFQPPCMTLSTIGLAQPGKIMRGVTAS  
QCKNHLHLQHVCMPSKKGHTRLLYRMSLDFLPWMRHV PFDRIWKQVAAQVLGEDLVLVLGQQDRMLRGGSNWS  
NPAPYDKLAVRYRRWRNGVNAEVARVRAGEPPSNPVAMSAGEMFSVDEDDMDN

**Arabidopsis thaliana Chlorophyllide a oxygenase (AtCAO):**

UniProt: Q9MBA1

ATGAACGCCCGCTGTTTAGTCCTTCTGCTTTATCTCTCCCTATCTCCTTCTCTAAAACCCGATCCTCTTTTCT  
CTCCAGAAAGAAGGGCGTGAAAGGAGAATTTAGGGTATTTGCTGTGTTTGGTGATGAGAGTGGATTAGTTGAGA  
AGAAGAGTCAATGGAGACCTTTGTTTATGATGTGGAGGATCCTAGATCAAAAAGCTCCTCCTTATAAAGGAAAGTTT  
TTAGATGTTAATCAAGCTATTGAAGTTGCTAGGTTTGTATATTCAATACTTGGATTGGCGTGCTCGTCAAGATCT  
TCTTACCATTATGATTCTTCATGACAAGGTTGTTGATGTACTTAATCCTCTAGCTCGTGAGTACAAGTCCATCG  
GTACAGTGAAGAAAGAACTAGCTGGATTGCAGGAAGAATTATCGAAAGCACACCAACAGGTTTCATATATCTGAA  
GCAAGGGTTTTGACTGCTTTAGACAAGTTAGCCACATGGAAGAATTGGTTAATGATAGGTTGTTACCTGGCAG  
AGTTGTAACGGAATTAGATAAACCCCTCCTCTTCAACCACTGCTTCTGCTGTCGAGTTAGATAGGGAAAAGACAA  
ACACGGGTGCGAAAAGCTTGAATGTTTCTGGTCCGGTTCGCCTTATAGTCCACACTTGAAGAATTTTGGTAT  
CCCGTTGCTTTCACTGCAGATCTCAAGCATGATACAATGGTACCAATTGAATGCTTTGAACAACCATGGGTTAT  
CTTTAGGGGTGAAGACGGGAAACCAGGATGTGTACGGAATACATGTGCGCATAGAGCATGTCCTCTTGATCTTG  
GCACAGTGAACGAGGGACGTATTCAATGTCCGTACCATGGATGGGAATACTCAACCGATGGAGAATGTAAGAAG  
ATGCCGTCTACAAAGTTACTGAAGGTGAAGATCAAATCATTACCTTGCTTTGAACAAGAAGGTATGATCTGGAT  
TTGGCCCGGTGATGAGCCACCTGCACCTATACTTCTTCTTTACAGCCTCCATCAGGGTTTTTAATTCATGCTG

AGCTTGTAATGGACCTCCCGGTGGAACACGGTTTACTTCTAGATAATCTCTTGGATCTTGCTCATGCCCCATTC  
ACTCATAACATCCACTTTTGCAAAAGGCTGGAGTGTCCCAAGTTTGGTGAAGTTTTTAACACCTACCTCGGGTCT  
CCAAGGATACTGGGATCCATATCCAATCGATATGGAATTTAAACCACCGTGTATTGTTTTATCGACAATCGGGA  
TATCAAAACCCGGGAAACTAGAAGGCAAAAGCACACAGCAGTGTGCAACACATCTTCATCAACTCCATGTCGT  
TTACCTTCTTCTAAAAACAAGACAAGACTTCTATACCGAATGTCACTAGACTTTGCTCCTATATTAAAGAATCT  
TCCATTCATGGAACATCTGTGGAGACATTTTCGCTGAACAGGTCTTAAACGAAGATCTACGGCTAGTTTTAGGAC  
AACAAGAACGGATGTTAAACGGAGCAAACATATGGAATTTACCAGTTGCTTATGACAAGCTCGGAGTTCGGTAT  
AGACTATGGAGGAACGCAGTAGATCGTGGCGATGATAAACTACCTTTCTCCGGCAGCAGCGGCGAAAATCTGTA  
CTTCCAAGGCAGCGGTAGCAGC

MNAAVFSPSALSPLISFSKTRSSFLSRKKGVKGEFRVFAVFGDESGLVEKKSQWRPLFDVEDPRSKAPPYKGF  
LDVNQAIIEVARFDIQYLDWRARQDLLTIMILHDKVVDVLNPLAREYKSIGTVKKELAGLQEELSKAHQQVHISE  
ARVSTALDKLAHMEELVNDRLLPGRVVTFLDKPSSSTTASAVELDREKNTGAKSLNVSGPVPPYSPHLKNFWY  
PVAFTADLKHDTPVIECFEQPWVIFRGEDGKPGCVRNTCAHRACPLDLGTVNEGRIQCPYHGWEYSTDGECKK  
MPSTKLLKVKIKSLPCLEQEGMIWIWPGDEPPAPILPSLQPPSGFLIHAELVMDLPVEHGLLLDNLLDLAHAPF  
THTSTFAKGWSVPSLVKFLTPSTGLQGYWDPYPIDMEFKPPCIVLSTIGISKPGKLEGKSTQQCATHLHQLHVC  
LPSSKNKTRLLYRMSLDFAPILKNLPFMEHLWRHFAEQVLNEDLRLVLGQQERMLNGANIWNLPVAYDKLGVRY  
RLWRNAVDRGDDKLPFSG

**Micromonas pusilla Chlorophyllide a oxygenase1 (MpCAO1):**

UniProt: C1MQW7

ATGATCCCGTTCGATCTGTTCAACGTCCCGTGGGTGCGGTTCCGCGACCAGGACGGCATGGCGGGGTGCATCAA  
GGACGAGTGC GCGCACAGGGCGTGCCCGATATCCCTCGGAAAGTCGTCGAAGGACGCGTGCAGTGCCCGTACC  
ACGGGTGGGAGTACACCTCGGGAGGGGAGTGCAAGAAGATGCCGTCGATAAAAAACCTCCTCCCGAACGTCTAC  
GTCGACGCCGCGCCGATCGTGGAGCGCGACGGGCTGTTATACGTGTGGGCGGGGTGTGGGAGCCGGAGAGGGC  
GGAGGAGATATTGAGCGAGCTCCCGCCGAGCGCGGCGACCGCGCCGAGCGGGTTCGCCCGCATGGCTGAGG  
TCACCGTCGACGTCCCGCTCGACGCGCCCGGATTTTGTGCGGACTGATGGACGAGAACAAGGTGCCGTTACG  
CGCGTGGACACGACGACGCTGAGCGACGACGCTTCCCGAAGGTGATCGCGAAGGTGTTGCGGGGGTTCGGTAA  
GCCCCGCGCGAAACGCGTGGAGTTCACCCGGCGTGCATACTCGACAGCACGATCGGTCTGGACGGCGTGGGCG  
GACAAGACTGGAACGTGCATCAGACGCACGTCGTGTTACCCTCGCGGCCCGGAAGGCGGGGTGTTGTACCGC  
CTCTCCGTGGACTTTGTCGTGCGCGCGGAGATCGCGCGGACCGTGGGCGGGCAGGTGTGGCAGAACCTCGCGGA  
GATGATCCTCCAAGAGCAGCTCGAGGGGATCCGGGGGGGAGGTTTCGAGGACGACAGCGTCCGGGAGCAGGCCG  
CGGACGTGTCGAGAGCTACGACGAGTGGATGGAAGAGATCCAGGCGCCGCGTGA

MIPFDLNFVWPVAFRDQDMAGCIKDECAHRACPIISLGKVVVEGRVQCPYHGWEYTSNGECKMPSIKNLLPNVY  
VDAAPIVERDGLLYVWAGVWEPEAAEILSELPPSAATAPPSGFAAMA EVTVDVPLDAPAIL SRLMDENKVPFT  
RVDTTTTLSDVFPKVIKVLGRFGKPAKRVETPACILDSTIGLDG VGGQDWNVHQTHVVLPSRPGKARVLYR  
LSVDFVVGAEIARTVGGQVWQNLAEMLIQEQLEGIRGGRFEDDSVGEQAADVSQS YDEWMEEIQAPR

**Micromonas pusilla Chlorophyllide a oxygenase2 (MpCAO2):**

UniProt: C1MZ04

ATGGCGCCCGAGGTGTCCTCCTCCCCGCGCCCGTGGACGCCTCGAGGGGGGGCGCTGAGAAAGCCGCGCGCAG  
GCTCGGCATGGGACGAAGGTTTCGCGGACGAGGTCTCCCTGGACAACCCCTCCGACGTCGGCGCGATCCGCAACT  
ATTGGTACCCGATCCACTTCATCTCGAAGCTGAACAAGGGCGACGCGGCCACCTCCTTCGTGCTCTTCGGCGAG  
CGGTGGGAGCTCGTCGCCGACGACGACGCCGCCGTCGCCGCCGGAAGACCGCCGTCGGCGTCTTCGGCCCGGA  
GTACGCGGAGACGCAGGCGCACCTGGTGGACGGCGCCGCACAGAGGTGGACGTGCCGCTCGCGCGACGACGCGA  
CGCGCTTCTCCCGATCGGGCTGCAGGACGGCTCGTCATGCCCGACGTCGCGTTGCCGACGACGTTTACACC  
CCGGCGGGGTACACGACGCACGCGGAGCTCATCATCGAGGACGTCCCCGTGGAGCACGGGCTGCTGATGGAGAA  
CCTGCTGGACCTCGCGCACGCGCCGTTACGCACACCCGGGACGTTTCGCGAAGGGCTGGGGCGTCCCCACGTTTCG  
TCGAGTTCGTCACGTCGAAGCTCCGGAGGGAAGGGGACGGGTGGCAGGACATGGCGCGAGGGCTCACGCGCGAG  
GGGATCGGGCTGGGGTTCGACGAGGGGTCGTGGAACCCGTACCCGATCGACATGAAGTTCGTCACGCCGTGCAT  
GGTGGACTCGCACATCGGGATGTCGACGGCTGGCGCCGCGGGGAAGGGGGCGCAGTTTGAAGAGGGCGTCCAGT  
GCGCGGAGTGCAGCAACCACCTCCACCAACTCCACGTGTGCGTGCCGTCCGAGCCGGGCGGACGCGCCTGCTG  
TATCGGATGGCGCTCGATTTTCGCCGGGTGGGCGAAGTACGTCCCGGGGATCGAGCTCGTGTGGACGGAGATGGC  
GAACCAGGCTTTGGGCGAGGACTTGAGGCTGGTGACCGGGCAGCAGGATCGGATGCGGAGAGGGCGGACGGGTGT  
GGGCGCATCCGGTGGCGTACGATAAGCTCGGGCTGGTGTACCGCAGGTGGAGGAAC TTCAGCGTTGGCGAGGCG  
TGCGACGTGAGCGGGTATCGGCGCGGAGGGGCGGGGGAGACGGCGCAGCGGTTCGCGGTGA

MAPEVSSSPAPVDASRGAEKAARRLGMGRRFADEVSLDNPSDVGAIRNYWYPIHFISKLNKDAATSFVLFGE  
RWELVADDDAAVAAAKTAVGVFGPEYAETQAHLDVGAQRWTCRSRDDATRFLPIGLQDGLVMPDVALPTTFTP  
PAGYTTHAELI IEDVPVEHGLLMENLLDLAHAPFHTGTFAKGWVPTFVEFVTSKLRREGDGWQDMARGLTRE  
GIGLGSQQGSWNPYPIDMKFVTPCMVDSHIGMSQAGAAGKGAQFEEGVQCAECSNHLHQLHVCVPSEPGRTRLL  
YRMALDFAGWAKYVPGIELVWTEMANQVLGEDLRLVLTGQQDRMRRGGRVWAHPVAYDKLGLVYRRWRNFSVGEA  
CDVSAGIGAEGAGETAQRSR

**Pseudomonas VanB**

UniProt: Q9HUQ8

ATGTACTTCCAATCCAATGCAATGATCGAGGTTTTGGTGGCAGCGGCCACCACGAGGCGCTGGATATTTGCGG  
CTACGAACTGACTGCTGTTGACGGTCAGCCACTGCCGGCATTTCAGGCGGGTGCACACATTGATGTCCACCTTC  
CTACTGGGATGATTCGCCAATATTCTTTATGCAATCACCTGAGGAACGCCATCGCTACCTTATTGGTGTCTG  
CGTGACCCCGCATCCCGTGGTGGGTCGCGCGGATGCACGAATTGATCGAGCCTGGTACACGTTTGCAAATCTC  
AGAGCCGCGCAATCTTTTCTTTGGCCCCGAGGCTCAACGTTCACTGCTTTTTCGGGAGGGATCGGGATCA  
CCCCGATCCTTTCAATGGCCGAGTTTCTGGCCCAAGACGGTGCCGCTTTCGAGCTGCACTACTGTGCGCGTTCC  
CGTGAGCGCGCAGCTTTCGTAGAACGTTTGCCTTTGTACCTTACGCGGACCGTGTCTTCTTCATTTTCGATGA  
AGAGCCGGACACCTTGCTGGACGCCGCTGCAGTCTGTGCGGCCAACTGATGATCTTCATTTATATGTCTGCG  
GACCCGGCGGATTCATGCAATATATTTTAGATACGGCGCGCCATCATGGGTGGGAAGAGACCCGCTTCACCGT  
GAGTATTTTCCGCGAGCGCCAGTTGATACGCGTGCAGGATGGTTCTTTCAGTGTAAGCTGGCGCGCTCGGGGCA  
GGTTTTTCGACATCCCGGCAGATCGCTCTGTAGTCCAAGTGTGGAATCACACGGGATCGAAATTCGAATAGTT  
GTGAGCAGGGCATCTGTGGAACCTGCTTGACCCGCGTCTTGGAAAGGGTCCCAGAACATCGCGATATGTTTTTA  
ACTGAAGCAGAGCAGGCGTGAATGATCAATTCACGCCCTGTTGCTCACGCTCAAAGACGCCTCTTCTGGTCTT  
TGACCTGTAGCATTGGAAGTGGATAA

MIEVIVGAIRLEAQDIHSFELFRADGAALPSFEPGAHIDLHLPNGLVRQYSLCGPAERPRHYRIAVLRCRDSRG  
GSATLHAE LRVGQRLHIGEP RNLFP LSP EPGPHLLFAGGIGITPLLAMAERLARDGADFQLHYCAHSGERAAAFV  
DYLGRCAFADRVHCHFDHGESSRRADLRALLATSPRDAQLYLCPAGFMQWIEESARELGWEASRLHREHFAAA  
PRDASADGTFEVQLASNGALIRVAAGQTVLAALREAGVDLPASCEQIGICGTCLTRVLDGEP EHRDLYLSEEEQA  
ANDCFTPCCSRSRSPRLVLDL

**Stenotrophomonas maltophilia Dicamba monooxygenase reductase, ferredoxin component (DdmB)**

UniProt: Q5S3I4

ATGCCGCAGATTACCGTCGTCAACCAGTCGGGTGAAGAATCCAGCGTCGAGGCGAGTGAAGGCCGCACCCTGATGGA  
AGTCATCCGCGACAGCGGTTTTGACGAACTCCTGGCGCTTTGCGGCGGCTGCTGCTCGTGC GCGACCTGCCACGTCC  
ACATCGACCCGGCCTTCATGGACAAGCTGCCGGAGATGAGCGAAGACGAGAACGACCTGCTCGACAGCTCGGACCAC  
CGCAACGAGTACTCGCGTCTCTCGTGCCAGATTCCGGTCACCGGCGCCCTCGAAGGCATCAAGGTGACGATCGCGCA  
GGAAGACTGA

MPQITVVNQSGEESVSEASEGR TLMEVIRDSGFDELLALCGGCCSCATCHVHIDPAFMDKLP EMBEDENDLLDSSDH  
RNEYSRLSCQIPVTGALEGIKVTIAQED

**Stenotrophomonas maltophilia Dicamba monooxygenase reductase (DdmA)**

UniProt: Q5S3I2

ATGAGCAAGGCAGACGTCGTAATCGTGGGAGCCGGGCATGGCGGCGCACAGTGC GCGATCGCCCTTCGCCAGAACGG  
CTTTCGAAGGAACCATCACCGTCATCGGTCGTGAGCCGGAATATCCCTATGAGCGTCCGCCGCTCTCGAAGGAATATT  
TCGCGCGCGAGAAGACCTTCGACCGCCTCTACATCCGTCCGCCGACGTTCTGGGCCGAGAAGAACATCGAGTTCAAG  
CTTGGCACCGAAGTCACCAAGGTGATCCCAAGGCGCACGAACTGACGCTCTCCAACGGCGAGAGCTACGGTTATGG  
CAAGCTCGTCTGGGCCACCGGCGGCGATCCGCGTCGCCTTTCTTGCCAGGGGGCCGACCTCACCGGCATCCACGCCG  
TGCGCACCCGCGAGGACTGCGACACGCTGATGGCCGAAGTCGATGCGGGCACGAAGAACATCGTCTGTCATCGGCGGC  
GGCTACATCGGTCTGGAAGCCGCTGCGGTGCTGTCCAAGATGGGCCTCAAGGTCACCCTGCTCGAAGCGCTTCCGCG  
CGTGCTGGCGCGCGTTGCGGGTGAAGACCTCTCGACCTTCTACCAGAAGGAACATGTCGATCACGGCGTCGACCTGC  
GCACCGAAGTCATGGTCGACAGCCTCGTCGGCGAAAACGGCAAGGTCACCGGCGTGCAGCTTGCCGGCGGCGAAGTG  
ATCCCGGCCGAAGGCGTCATCGTCGGCATCGGCATCGTGCCTGCCGTGGTCCGCTGATCGCGGCGGCGCGGCCG  
TGCCAACGGCGTCGACGTGGACGAGTACTGCCGCACCTCGCTGCCCGACATCTATGCGATCGGCGACTGTGCGGCTT  
TCGCCTGCGACTACGCCGGCGGCAACGTGATGCGCGTGAATCGGTCCAGAACGCCAACGACATGGGCACCTGCGTG  
GCCAAGGCGATCTGCGGCGACGAGAAGCCCTACAAGGCGTTCCCGTGGTTCTGGTCCAACCAGTACGACCTCAAGCT  
GCAGACCGCCGGCATCAACCTGGGCTTCGACAAGACCGTGATCCGCGGCAATCCGGAGGAGCGCAGCTTCTCGGTGCG  
TCTATCTCAAGGACGGCCGCGTGGTTCGCGCTGGACTGCGTGAACATGGTCAAGGATTACGTGCAGGGCCGCAAGCTG  
GTCGAAGCCGGGGCCACCCCGACCTCGAAGCGCTGGCCGATGCCGGCAAGCCGCTCAAGGAACTGCTCTAG

MSKADVIVGAGHGAQCAIALRQNGFEGTITVIGREPEYPYERPPLSKEYFAREKTFDRLYIRPPTFWAEKNIEFK  
LGTEVTKVDPKAHELTLNNGESYGYGKLVWATGGDPRLSCQADLTGIHAVRTREDCDTLMAEVDAGTKNIVVIGG  
GYIGLEAAAVLSKMGLKVTLLEALPRVRLARVAGEDLSTFYQKEHVDHGVDLRTEVMVDSL VGENGKVTGVQLAGGEV



IPAEGVIVGIGIVPAVGPLIAAGAAGANGVDVDEYCRTSLPDIYAIGDCAAFACDYAGGNVMRVESVQNANDMGTCV  
AKAICGDEKPYKAFPWFWSNOYDLKLQTAGINLGFDKTVIRGNPEERSFSVVYLKDGRVVALDCVMNVKDYVQGRKL  
VEAGATPDLEALADAGKPLKELL

**Comamonas testosteroni Tsab**

UniProt: P94680

ATGAGCGCCGATGTGCCCGTGACCGTGGCCGCGGTGCGGGCGGTGGCCCGCGACGTGCTGGCGCTGGAAC TGCGCCA  
CGCCAACGGCCAGCCCCTGCCCGGCGCCAGCGCCGGTGCCACATTGACCTCGCCCTGCCAATGGCCTGGTGCGCC  
AGTACTCGCTGGTGAACGCCACCGGCCAGGCCACCATGGACTGCTACCAGGTGGCCGTGGGCTGGGACGCCAACAGC  
CGTGGCGGCTCGGTGTGGATTACGAAAAGCTCAAGGTGGGCCAGGCCCTGCGCGTGACGCACCGCGCAACCTGTTC  
CGAGATGGCGCCCGAGCACCGCCGCGTGCTGCTGCTGGCCGGTGGCATTGGCGTCACGCCATCTACGCCATGGCCC  
AGGCTTGCGCGCAGCAAGGCGTGGACGTTGAGCTGTGGGCCAGCGCCCGCTCGGCCCGCGCCTGGCCTACTTGAA  
GAACTCAAGGCACTGCTGGGCCAGCGCCTGCACCTGCATGCCGACGACGAGCAGGGCGGCCCATGAACCTCACCGA  
GCGCCTGGCCACCCAGCGCTGGGACGCGTTTTACGCCTGCGGCCCGCGCCCATGCTGGACGCGCTCACCGCCGCCA  
CCGCCACTGGGCGCCGGGCTCGGTGCGCATGGAACGCTTCAAGGGCGCCGAGCAGCCCGCCAGCGAGCGCCAGCCC  
TTTGAGCTGGTGTGCTGCAGCGCGCCGGCCTGAGCACCACGGTGGACGCGCACGAGAGCGTGCTCGACGCCATGGAGCG  
CGTGGGCGTGGACTTCCCTTGGTGTGCGCGAAGGCATTTGCGGCACCTGCGAAGCGCCGGTGTGCTCGAAGGCGAGG  
TGCAGCACCTCGATTACGTGCTCTCGCCCGAAGAACGCGCCGAACAGCGGCGAATGATGGTCTGCGTGTGCGGTTGT  
GGCGGCGGCCGGCTGGTCCTGGACATCTGA

MSADVPVTVA AVRVARVDVLALELRHANGQPLPGASAGAHIDLALPNGLVRQYSLVNATGQATMDCYQVAVGWDANS  
RGGSVWIHEKLVKQALRVTHRATCSEMAPEHRRVLLL LAGGIGVTP IYAMAQACAQQGVDVELWASARSAPRLAYLE  
ELKALLGQRLHLHADDEQGGPMNLTERLATQRWD AVYACGPAPMLDALTAATAHWAPGSVRMERFKGAEQPASERQP  
FELVLQRAGLSTTVDAHESVLDAMERVGVD FPWSCREGICGTCEAPVLEGEVQHLDYVLSPEERAEQRRMMVCVSR  
GGRLVLDI

**Escherichia coli Flavodoxin reductase**

UniProt: P28861

ATGGCTGATTGGGTAACAGGCAAAGTCACTAAAGTGCAGAACTGGACCGACGCCCTGTTTTAGTCTCACCGTTCACGC  
CCCCGTGCTTCCGTTTTACCGCCGGGCAATTTACCAAGCTTGGCCTTGAAATCGACGGCGAACCGGTCCAGCGCGCCT  
ACTCCTATGTAAACTCGCCCGATAATCCCGATCTGGAGTTTTACCTGGTCACCGTCCCCGATGGCAAATTAAGCCCA  
CGACTGGCGGCACTGAAACCAGGCGATGAAGTGCAGGTGGTTAGCGAAGCGGCAGGATTCTTTGTGCTCGATGAAGT  
GCCGCACTGCGAAACGCTATGGATGCTGGCAACCGGTACAGCGATTGGCCCTTATTTATCGATTCTGCAACTAGGTA  
AAGATTTAGATCGCTTCAAAAATCTGGTCTGGTGCACGCCGCACGTTATGCCGCCGACTTAAGCTATTTGCCACTG  
ATGCAGGAACTGGAAAAACGCTACGAAGGAAAAC TGCGCATT CAGACGGTGGTCAGTCGGGAAACGGCAGCGGGGTC  
GCTCACCGGACGGATACCGGCATTAATTGAAAGTGGGGAAC TGGAAAGCACGATTGGCCTGCCGATGAATAAAGAAA  
CCAGCCATGTGATGCTGTGCGGCAATCCACAGATGGTGC GCGATA CACAACAGTTGCTGAAAGAGACCCGGCAGATG  
ACGAAACATTTACGTGCGCCGACCGGGCCATATGACAGCGGAGCATTACTGGTAA

MADWVTGKVTKVQNWTDALFSLTVHAPVLPFTAGQFTKLGLEIDGERVQRAYSYVNSPDNPDLEFYLVTPDGKLS  
RLAALKPGDEVQVVSEAAGFFVLDEVPHCETLWMLATGTAIGPYLSILQLGKDLDRFKNLVLVHAARYAADLSYLP

MQELEKRYEGKLRIQTVVSRETAAGSLTGRIPALIESGELESTIGLPMNKETSHVMLCGNPQMVRDTQQLLKETROM  
TKHLRRRPGHMTAEHYW

### **Escherichia coli Flavodoxin**

UniProt: P61950

ATGGCTATCACTGGCATCTTTTTTCGGCAGCGACACCGGTAATACCGAAAATATCGCAAAAATGATTCAAAAACAGCT  
TGGTAAAGACGTTGCCGATGTCCATGACATTGCAAAAAGCAGCAAAGAAGATCTGGAAGCTTATGACATTCTGCTGC  
TGGGCATCCCAACCTGGTATTACGGCGAAGCGCAGTGTGACTGGGATGACTTCTTCCCGACTCTCGAAGAGATTGAT  
TTCAATGGCAAACCTGGTTGCGCTGTTTTGGTTGTGGTGACCAGGAAGATTACGCCGAATATTTCTGCGACGCATTGGG  
CACCATCCGCGACATCATTGAACCGCGCGGTGCAACCATCGTTGGTCACTGGCCAACCTGCGGGCTATCATTTCGAAG  
CATCAAAGGTCTGGCAGATGACGACCACTTTGTGGTCTGGCTATCGACGAAGACCGTCAGCCGGAACCTGACCGCT  
GAACGTGTAGAAAAATGGGTTAAACAGATTTCTGAAGAGTTGCATCTCGACGAAATTCTCAATGCC

MAITGIFFGSDTGN TENIAKMIQKQLGKDVADVHDI AKSSKEDLEAYDILLLGIPTWYYG EAQCDWDDFFPTLEEID  
FNGKLVALFGCGDQEDYAEYFCDALGTIRDIIEPRGATIVGHWP TAGYHF EASKGLADDDHFVGLAIDEDRQPELTA  
ERVEKWVKQISEELHLDEILNA

### **Triticum aestivum Chlorophyllase**

UniProt: A0A3B6QC98

ATGGCTAGCGCAGCAGCAGCACCCGCGAGAGACGATGAACAAGTCCGCCCGCGCCGAGGTTCCCGAGGCGTT  
CACATCGGTGTTCCAGCCGGGGAAGCTTGCGGTGCGAGGCGATTACAGGTGGATGAGAATGCGGCGCCGACACCAC  
CGATCCCGGTGCTGATCGTCGCACCCAAGGATGCAGGAACCTACCCCGTGGCCATGCTCTTGCACGGCTTCTTC  
CTCCATAACCACTTCTACGAACACCTTCTCCGGCAGCTCGCATCCCACGGCTTCATCATTGTGCGGCCCCAGTT  
CAGCATCAGTATCATACTTCCGGGTGACGCAGAGGACATCGCCGCGGCAGCCAAGGTGGCAGACTGGCTCCCCG  
ACGGCCTCCCGTCCGTGCTGCCCAAAGGCGTGCAGCCGAGCTCTCGAAGCTCGCCTTGCCCGGCCACAGCCGA  
GGAGGCCACACGGCTTTCTCCCTGGCCTTGGGGCAGCCAAGACCCAGCTAACCTTCTCCGCGCTCATCGGACT  
CGACCCCGTCCGCGGCACGGGGAAGTCCCTCCAGCTCCAGCCCAAGATCCTCACCTACGAGCCGTCCCTCCTCG  
GCATGGCGATGCCGGTGTGGTTCATCGGCACCGGGCTCGGCGAGGAGAAGAACAATATTCTTCCCTCCCTGC  
GCACCCAAGGACGTGAACCACGCCGAGTCTTACCGCGAGTGCAGGCCGCCCTGCTACTACCTTGTGACCAAGGA  
CTACGGGCATCTGGACATGCTGGACGACGACGCCCCAAGTTCATCACCTGCGTCTGCAAGGATGGGAACGGGT  
GCAAGGGCAAGATACGGAGGTGCGTTGCTGGGATCATGGTGGCATTCTTAATGCTGCCTTGGGTGAGAAAGAT  
GCAGATCTTGAGGCCATACTGAGAGACCCGCGGTTGCACCCACCACGCTTGATCCGGTTGAGCACCGCGTGGC  
GGCGGCCGCACTCGAG

MASAAAAPAE TMNKS AAGAEVPEAFTSVFQPGKLAVEAIQVDENAAPTPIPV LIVAPKDAGTYPVAMLLHGF  
LHNHFYEHLLRHVASHGFIIVAPQFSISIPSGDAEDIAAAA KVADWLPDGLPSVLPKGVPEPELSKLALAGHSR  
GGHTAFSLALGHAKTQLTFSALIGLDPVAGT GKSSQLQPKILTYEPSSFGMAMPVLVIGTGLGEEKKNIFFPPC  
APKDVNHAEFYRECRPPCYLVT KDYGHL DMLDDDAPKFI TCVKDGNCKGKIRRCVAGIMVAFLNAALGEK  
ADLEAILRDP AVAPTTLDPVEHRVAAAALE

## **IIb. Protein production and purification**

### **Protein Expression Protocols *PhCAO***

Small-scale expression tests on an N-terminal 6X-His-tagged construct of *PhCAO* in different *E. coli* strains (BL21(DE3), C41(DE3) and  $\Delta$ *iscR* BL21-(DE3)) revealed no significant overexpression under different levels of Isopropyl  $\beta$ -D-1-thiogalactopyranoside or at different temperatures. A C-terminal 6X-His-tagged construct was subsequently tested and shown to yield better overexpression of the target *PhCAO* protein in the  $\Delta$ *iscR* BL21-(DE3) cell line. However, analysis by gel filtration chromatography suggested that this purified protein existed predominantly as an aggregate. Thus, a new codon optimized construct was cloned into the pMCSG9 vector (Genscript). This construct contains an N-terminal His-MBP tag and was tested for expression in the *E. coli* strains listed above. The pMCSG9 plasmid containing *PhCAO* was transformed by standard heat-shock protocols into C41(DE3) chemically competent *E. coli* cells, which showed the highest level of over-expression. A 5 mL starter was grown from one colony in Luria Broth (LB) containing 50  $\mu$ g/mL ampicillin in a constant temperature incubator at 37°C and 200 rpm. After an overnight incubation, the starter culture was used to inoculate larger 1 L Terrific Broth (TB) cultures containing 50  $\mu$ g/mL ampicillin. These 1 L cultures were grown at 37°C and shaken at 200 rpm until the optical density at 600 nm ( $OD_{600}$ ) reached a value of approximately 0.8-1.0. At this point, flasks were incubated at 20°C, left for 2 hours, and induced by the addition of 0.2 mM isopropyl- $\beta$ -D-1-thiogalactopyranoside (IPTG), 0.2 mg/mL ferric ammonium citrate, and 0.4 mg/mL ferrous sulfate heptahydrate. The temperature of the incubator was then decreased to 18°C and left for an additional 16 hours before harvesting.

### **Protein Expression Protocols for His-tagged *AtCAO* and His-tagged *CrCAO***

As described for *PhCAO*, both *AtCAO* and *CrCAO* were codon optimized, synthesized, and cloned into pET-41b(+) plasmids by Genscript. These *AtCAO* and *CrCAO* plasmids were transformed by standard heat shock protocols into  $\Delta$ *lscR* chemically competent cells and plated on LB plates containing 50  $\mu$ g/mL kanamycin. 5 mL starter cultures were grown and used to inoculate 1 L TB cultures containing 50  $\mu$ g/mL kanamycin. Expression of both *AtCAO* and *CrCAO* was induced as described for *PhCAO*.

### **Protein Expression Protocols for *MpCAO1* and *MpCAO2***

A pRSFDuet-1 plasmid containing codon optimized *MpCAO1* and *MpCAO2* genes was transformed by standard heat-shock protocols into C41(DE3) chemically competent cells. Starters were grown as described for *PhCAO* and subsequently used to inoculate 1 L cultures of LB containing 50  $\mu$ g/mL kanamycin. Cultures were grown at 37°C, 200 rpm until the  $OD_{600}$  reached 0.6-0.8. Following the addition of 0.2 mM isopropyl- $\beta$ -D-1-thiogalactopyranoside (IPTG), flasks were then incubated at 20°C for 16 hours before harvesting.

### **Protein Expression Conditions for the reductase proteins VanB, DdmB, DdmA, TsaB, and *E. coli* flavodoxin (Flv) and *E. coli* flavodoxin (Flx) reductase.**

The methods for purifying VanB, DdmB, DdmA, and *E. coli* Flv and Flx were previously described and were followed here<sup>3-5</sup>. In brief, these methods require a pMCSG7-*vanB*, pMCSG7-*ddmB*, pMCSG7-*ddmA*, pET28a-*flv*, and pET28a-*flx* plasmids, as well as BL21(DE3) (VanB, Flv,

and Flx) and C41(DE3) (DdmB and DdmA) *E. coli* cells. TsaB, on the other hand, was codon optimized, synthesized, and cloned into a pet-28a(+)-TEV plasmid by Genscript. This pET28a(+)-TEV-*tsaB* plasmid was transformed into BL21(DE3) *E. coli* cells. TsaB was then grown and expressed in cultures of TB containing 50 µg/mL kanamycin until the OD<sub>600</sub> reached 0.6-0.8. At this point, expression was induced with 0.1 mM IPTG. These cultures were then left at 20°C for 16 hours.

### **Protein Expression Protocols for *T. aestivum* Chlorophyllase**

A pET21d plasmid containing an N-terminal 6X-His-tagged *T. aestivum* chlorophyllase was synthesized and codon-optimized for *E. coli* expression by Genscript. However, this initial plasmid did not result in overexpression of the chlorophyllase protein. Thus, the codon-optimized chlorophyllase gene was subcloned into a pET21d plasmid that contained a C-terminal 6X-His-tag. This new construct was transformed into BL21(DE3) *E. coli* competent cells. To produce the chlorophyllase protein, a single colony of the transformant was grown in LB medium that contained 50 µg/mL of ampicillin at 37°C. When the OD<sub>600</sub> of this culture reached 0.8, protein expression was induced with 0.5 mM IPTG for 16 hours at 16°C.

### **Protein Purification Protocols for His-MBP-tagged *PhCAO***

The cell pellet produced from 1 L of culture that contained the over-expressed His-MBP-tagged *PhCAO* was resuspended in 50 mL of lysis Buffer (50 mM Tris-HCl (pH 7.5), 200 mM NaCl, and 5% glycerol). Resuspended cells were lysed by sonication and clarified by centrifugation in an Eppendorf centrifuge 5810R at 12,000 x g for 40 min. The supernatant, which contained the MBP-tagged protein *PhCAO*, was loaded onto 5 mL MBP-Trap column (Cytiva). This column was washed with 10 column volumes of Buffer A (50 mM Tris-HCl (pH 7.5), 200 mM NaCl, and 5% glycerol) and eluted with a five-column volume gradient of Buffer B (50 mM Tris-HCl (pH 7.5), 200 mM NaCl, 5% glycerol, and 10 mM maltose). Fractions that bound to the column which contained the MBP-*PhCAO* were pooled and dialyzed into Buffer C (20 mM Tris-HCl (pH 7.5), 50 mM NaCl, 1 mM DTT, and 10% glycerol). Following buffer exchange, the His-MBP tag from the *PhCAO* protein was cleaved using 5 mg of Tobacco Etch Virus (TEV) protease. Following a 20 h incubation at 4°C, the tag cleavage reaction was complete. The tag-free protein was loaded onto a 5 mL His-Trap (Cytiva) for further purification and removal of TEV protease and the cleaved His-MBP tag. The flow-through from the column, which contained the desired tag-free protein was concentrated and loaded onto a HiPrep 16/60 Sephacryl S200-HR (Cytiva) gel filtration column that was pre-equilibrated in Buffer D (50 mM HEPES (pH 8.0), 200 mM NaCl, and 10% glycerol).

### **Protein Purification Protocols for *AtCAO* and *CrCAO***

The cell pellet produced from a 1 L of culture that contained the over-expressed 6X-His-tagged *AtCAO* or *CrCAO* was resuspended in Buffer A (50 mM Tris-HCl (pH 7.5), 200 mM NaCl, 10 mM imidazole, and 5% glycerol). Cells were lysed by sonication, centrifuged, and loaded onto 5 mL His-Trap column. This column was washed with 10 column volumes of Buffer A and eluted with a five-column volume gradient of Buffer B (50 mM Tris-HCl (pH 7.5), 200 mM NaCl, 200 mM

imidazole, and 5% glycerol). Fractions containing the *At*CAO or *Cr*CAO were pooled and exchanged into storage Buffer (50 mM HEPES (pH 8.0), 200 mM NaCl, and 10% glycerol) using a PD-10 desalting column (BioRad) to remove imidazole.

### **Protein Purification Protocols for *Mp*CAO1 and *Mp*CAO2**

The cell pellet produced from a 2 L culture of *Mp*CAO1 and *Mp*CAO2 was resuspended in 50 mL lysis Buffer (50 mM HEPES (pH 7.5), 250 mM NaCl, and 5% glycerol). Cells were lysed by sonication and centrifuged. The supernatant, which contained the His-tagged proteins *Mp*CAO1 and *Mp*CAO2 was loaded onto a 5 mL His-Trap column. This column was performed, and the protein was stored as described for *At*CAO and *Cr*CAO.

### **Purification protocol for the reductase proteins VanB, DdmB, DdmA, TsaB, and *E. coli* Flv and Flx**

The methods for purifying VanB, DdmB, DdmA, were previously described and were followed here<sup>3-4</sup>. In short, the cells from 2 L cultures were resuspended in 50 mL of Buffer A (50 mM Tris-HCl pH 8.0, 200 mM NaCl, 20 mM imidazole, and 10% glycerol). These proteins were then lysed, centrifuged, and purified using nickel affinity and gel filtration chromatography. *E. coli* Flv and Flx were purified using a similar protocol with small deviations. Specifically, the Flv and Flx buffers, as previously described<sup>5</sup>, contained 20 mM Tris-HCl (pH 8.5), 1 M NaCl, 10  $\mu$ M FMN (Flv) or 10  $\mu$ M FAD (Flx), and either 20 mM or 200 mM imidazole. Purified proteins were concentrated to approximately 200  $\mu$ M and flash frozen by liquid nitrogen and stored at -80°C.

### **Protein Purification Protocol for *T. aestivum* Chlorophyllase**

The cell pellet harvested after overexpressing chlorophyllase was resuspended in Buffer A (50 mM Tris-HCl (pH 7.5), 100 mM NaCl and 5 mM imidazole). The cells were lysed by sonication, centrifuged, and loaded onto a 5 mL Ni-NTA column. Once the supernatant was all loaded, Buffer A was used to wash the column for 10 column volumes. C-terminal His-tagged Chlorophyllase was eluted using Buffer B which contained 50 mM Tris-HCl pH 7.5, 100 mM NaCl and 200 mM imidazole. The purified Chlorophyllase was concentrated to 5 ml and was loaded onto a Superdex 200 size exclusion column that was pre-equilibrated with Buffer C containing 50 mM HEPES pH 7.5 and 100 mM NaCl. Chlorophyllase was eluted as a dimer in the size exclusion column with Buffer C. Chlorophyllase was concentrated to around 60  $\mu$ M and flash frozen using liquid nitrogen for long-term storage in -80°C freezer.

**Caution!** *Liquid nitrogen is hazardous and may cause cryogenic burns or injury. It was handled with correct protection precautions in minimal amounts.*

## **IIc. Preparation of Substrates and Product Standards**

### **Chlorophyllase reaction to produce Chlorophyllide species**

Purified His-tagged chlorophyllase (Chlase) was stored in the -80°C freezer at a stock concentration of 30  $\mu$ M. To perform a reaction, 2  $\mu$ M Chlase was combined with 160  $\mu$ M of the desired Chlorophyll molecule in DMSO (Chl *a*, Chl *b*, 7-OH-Chl *a*, and Bchl *a*), and 50 mM Tris-

HCl (pH 7.2). Reactions were initiated by addition of a Chl molecule and incubated at 30°C for 2 h in the dark. Reactions were quenched by the addition of 150 µL acetonitrile (HPLC-grade). Quenched reactions were centrifuged at 17,000 x g for 10 min. 50 µL of the supernatant was diluted with 150 µL acetonitrile containing 0.5 mM 1,3,5-trimethoxy-benzene as internal standard.

**Caution!** Acetonitrile is classified as a GHS category 2 flammable liquid. Keep away from open flames and heat. Non nitrile gloves need to be worn when working with this liquid as it can penetrate nitrile gloves.

### Preparation of 7-OH-Chlorophyllide a

The preparation of 7-OH-Chlorophyllide a was accomplished in two steps. The first step, production of 7-OH-Chlorophyll a, was performed using previously described methods<sup>6</sup>. In short, 1 mg of Chlorophyll b from spinach (Sigma Aldrich) was dissolved in 5 mL of methanol containing 1.0 mg of NaBH<sub>4</sub>. The reaction was stirred for 2 min at room temperature and then quenched by the addition of 5 ml solution of saturated NaCl. The reaction products were then transferred into dichloromethane (DCM) and dried by anhydrous sodium sulfate. A rotary evaporator was then used to remove extra solvent. The second step was to convert the produced 7-OH-Chlorophyll a into 7-OH-Chlorophyllide a. This step was accomplished using purified chlorophyllase and the methods described above.

**Caution!** Sodium borohydride (CAS: 16940-66-2) is water reactive and highly flammable. Must be handled under inert gas. All manipulations were performed on smallest practical scale.

### Preparation of Chlorophyllide a'

To prepare Chlorophyllide a', we capitalized on a previous method<sup>7</sup> and made small modifications. In short, Chlorophyllide a' was prepared by dissolving 1 mg of Chlorophyll a (Frontier Scientific) in 5 mL of diethyl ether. To this solution 50 µL of pyridine was added to a final volume of 1%. The reaction was stirred at room temperature for 1.5 hours before removal of the solvent using a rotary evaporator. The resulting liquid containing both diastereomers of Chlorophyllide a was then dissolved in 200 µL of DMSO for storage. A second step that employed chlorophyllase and the methods described above was followed to produce Chlorophyllide a'.

**Caution!** DMSO is a combustible liquid and must be handled using correct protection precautions.

### Preparation of Chlorophyllide b'

The preparation of Chlorophyllide b' was accomplished using 1 mg of Chlorophyll b (Sigma Aldrich). The protocol followed was like that described previously<sup>7</sup>, and for Chlorophyllide a'. First, Chlorophyll b was dissolved in 1 mL of diethyl ether. Then 200 µL of this solution was added into an additional 1.6 mL of diethyl ether and 15% pyridine. The reaction was stirred at room temperature for 14 h before removal of the solvent via using a rotary evaporator. The resulting liquid containing both diastereomers was then dissolved in 200 µL of DMSO for storage. Finally, chlorophyllase was used to complete production of Chlorophyllide b'.

### **Preparation of 3-formyl-Chlorophyllide *a* and 3-formyl-Chlorophyllide *b***

To prepare 3-formyl-Chlorophyllide *a* and 3-formyl-Chlorophyllide *b*, we capitalized on a previous method<sup>2</sup> and made small modifications. Briefly, 1 mM Chlorophyll *a* or Chlorophyll *b* was mixed with 10  $\mu$ M chlorophyllase and incubated at 30°C for 1 h to produce Chlorophyllide *a*. 5  $\mu$ L of  $\beta$ -mercaptoethanol ( $\beta$ ME) and 200  $\mu$ M heme chloride were then added into this reaction mixture for another 4-hour incubation at 30°C. The resulting liquid containing a mixture of Chlorophyllide *a* and 3-formyl-Chlorophyllide *a* or a mixture of Chlorophyllide *b* and 3-formyl-Chlorophyllide *b* was then fast-frozen by liquid nitrogen for storage for future assays.

## **IId. Enzymatic Reactions**

### **CAO reactions in cell lysate**

Stocks of each of the CAO homologs were prepared from purified (and frozen) stocks of *Ph*CAO, or His-tagged *At*CAO, *Cr*CAO and *Mp*CAO at a concentration of 100  $\mu$ M. *A. thaliana*, Spinach, Green Algae, Barely, and *E. coli* cell lysate (GenLysate, GBiosciences) were reconstituted by adding 100  $\mu$ L MQ water, respectively. Reactions consisting of 20  $\mu$ M CAO homolog, 10  $\mu$ L lysate solution, 1  $\mu$ M Chlase, 100  $\mu$ M Chl *a*, 500  $\mu$ M NADPH, 200  $\mu$ M  $\text{Fe}(\text{NH}_4)_2(\text{SO}_4)_2$  and 50 mM Tris-HCl pH 7.2 were mixed and incubated at 30°C for 3 hours in the dark. These reactions were then quenched by the addition of 150  $\mu$ L acetonitrile. Quenched reactions were centrifuged at 17,000  $\times g$  for 10 min and 50  $\mu$ L of the supernatant was diluted with 150  $\mu$ L acetonitrile containing an internal standard (0.5 mM 1,3,5-trimethoxy-benzene as internal standard). Equivalent reactions were performed with Spinach, Barley, Green Algae, and *E. coli* lysate (GenLysate, GBiosciences).

### **CAO reactions with non-native reductases TsaB, DdmA/B, VanB, Spinach ferredoxin/ferredoxin reductase and *E. coli* flavodoxin/flavodoxin reductase**

Stocks of each of the CAO homologs were prepared from purified (and frozen) stocks of *Ph*CAO, or His-tagged *At*CAO, *Cr*CAO and *Mp*CAO at a concentration of 100  $\mu$ M. The ability of VanB to reduce the Fe-S cluster of *Ph*CAO was tested by titrating 1.5 equivalents of VanB into a sample that contains 45  $\mu$ M of *Ph*CAO with 1 mM NADPH at room temperature. The UV-Vis spectrum was measured by NanoDrop (ThermoScientific). Reactions consisting of 20  $\mu$ M CAO, 40  $\mu$ M VanB, 1  $\mu$ M Chlase, 100  $\mu$ M Chl *a* or 80  $\mu$ M 7-OH-Chlorophyllide *a*, 500  $\mu$ M NADPH, 200  $\mu$ M  $\text{Fe}(\text{NH}_4)_2(\text{SO}_4)_2$ , and 50 mM Tris-HCl pH 7.2 were mixed and incubated at 30°C in the dark. After 3 h, these reactions were quenched by the addition of 150  $\mu$ L acetonitrile. Quenched reactions were centrifuged at 17,000  $\times g$  for 10 min and 50  $\mu$ L of the supernatant was diluted with 150  $\mu$ L acetonitrile containing 0.5 mM 1,3,5-trimethoxy-benzene as internal standard. Equivalent reactions were performed with 40  $\mu$ M of TsaB, 32  $\mu$ M DdmA/DdmB, 20  $\mu$ M *E. coli* flavodoxin/60  $\mu$ M flavodoxin reductase, or 20  $\mu$ M Spinach ferredoxin/60  $\mu$ M ferredoxin reductase (Sigma Aldrich). However, it was determined that VanB provided the highest level of activity for the assays. In addition, equivalent reactions were also performed with Chl *a*, Bchl *a* Bchl *a*, 3-formyl-Chlide *a* (Chlide *d*), and Pheophorbide *a*.

### LC-MS and MS/MS analysis

Liquid chromatography-mass spectrometry (LC-MS) analysis was performed on an Agilent G6545A quadrupole-time of flight (Q-TOF) or an Agilent 6230 time of flight (TOF) mass spectrometer equipped with a dual AJS ESI source and an Agilent 1290 Infinity series diode array detector, autosampler, and binary pump. Solvent A contained water with 0.1% formic acid. Solvent B contained 95% acetonitrile, 5% water and 0.1% formic acid. For all separations, a ZORBAX RRHT StableBond Aq (2.1 x 50 mm, 1.8  $\mu\text{m}$ , 80Å) column from Agilent was used. The employed chromatographic method used was made up of three steps: (step i) 40% Solvent B 0-1 min, (step ii) a linear gradient to 100% Solvent B over 1 min, and (step iii) 100% Solvent B for 2 min. 2.0  $\mu\text{L}$  injections were made for each sample and the column was run at 0.4 mL/min.

### Steady-state kinetics of *PhCAO* with 7-OH-Chlorophyllide *a*

To determine the linear range for kinetic analysis, duplicate 50  $\mu\text{L}$  reactions with 10  $\mu\text{M}$  *PhCAO* and 10  $\mu\text{M}$  7-OH-Chlorophyllide *a* were performed and analyzed compared to an internal standard (15 mM 1,3,5-trimethoxy-benzene) by LC/MS. A 5 min time point was demonstrated to be the optimal time to capture the initial reaction rate.

To determine the steady-state kinetic parameters of *PhCAO* with a 7-OH-Chlorophyllide *a* substrate, reactions were conducted on a 50  $\mu\text{L}$  scale with substrate ranging 0.4  $\mu\text{M}$  – 80  $\mu\text{M}$  in duplicate with 10  $\mu\text{M}$  *PhCAO*, 15  $\mu\text{M}$  VanB, 500  $\mu\text{M}$  NADPH, 200  $\mu\text{M}$   $\text{Fe}(\text{NH}_4)_2(\text{SO}_4)_2$  and 50 mM Tris-HCl (pH 7.2) buffer. Prior to reaction initiation, 1 mM 7-OH-Chlorophyll *a* was incubated with 5  $\mu\text{M}$  chlorophyllase at 30°C for 2 h to generate the needed substrate, 7-OH-Chlorophyllide *a*. CAO reactions were then initiated by the addition of freshly-made 7-OH-Chlorophyllide *a* and quenched after 5 min by the addition of 150  $\mu\text{L}$  acetonitrile. Quenched reactions were centrifuged at 17,000 x *g* for 10 min and 50  $\mu\text{L}$  of the supernatant was diluted with 150  $\mu\text{L}$  acetonitrile containing 15 mM 1,3,5-trimethoxy-benzene as an internal standard. 2  $\mu\text{L}$  each sample was injected on the Q-TOF LC/MS. The result data points were then plotted and fitted into Michaelis-Menten curve using GraphPad Prism.



### III. Supplementary References

1. Kunugi, M.; Takabayashi, A.; Tanaka, A., Evolutionary changes in chlorophyllide a oxygenase (CAO) structure contribute to the acquisition of a new light-harvesting complex in micromonas. *J Biol Chem* **2013**, *288* (27), 19330-41.
2. Loughlin, P. C.; Willows, R. D.; Chen, M., In vitro conversion of vinyl to formyl groups in naturally occurring chlorophylls. *Sci Rep* **2014**, *4*, 6069.
3. Lukowski, A. L.; Liu, J.; Bridwell-Rabb, J.; Narayan, A. R. H., Structural basis for divergent C-H hydroxylation selectivity in two Rieske oxygenases. *Nat Commun* **2020**, *11* (1), 2991.
4. Lukowski, A. L.; Ellinwood, D. C.; Hinze, M. E.; DeLuca, R. J.; Du Bois, J.; Hall, S.; Narayan, A. R. H., C-H Hydroxylation in Paralytic Shellfish Toxin Biosynthesis. *J Am Chem Soc* **2018**, *140* (37), 11863-11869.
5. Lanz, N. D.; Grove, T. L.; Gogonea, C. B.; Lee, K. H.; Krebs, C.; Booker, S. J., RlmN and AtsB as models for the overproduction and characterization of radical SAM proteins. *Methods Enzymol* **2012**, *516*, 125-52.
6. Wang, X.; Liu, L., Crystal Structure and Catalytic Mechanism of 7-Hydroxymethyl Chlorophyll a Reductase. *J Biol Chem* **2016**, *291* (25), 13349-59.
7. Helfrich, M.; Bommer, B.; Oster, U.; Klement, H.; Mayer, K.; Larkum, A. W.; Rudiger, W., Chlorophylls of the c family: absolute configuration and inhibition of NADPH:protochlorophyllide oxidoreductase. *Biochim Biophys Acta* **2003**, *1605* (1-3), 97-103.
